# Supplementary material
Source: PubMed Central journal article supplement (PMC7667828)

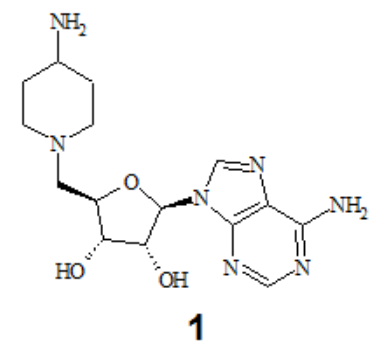

DMSO-*d*<sub>6</sub>

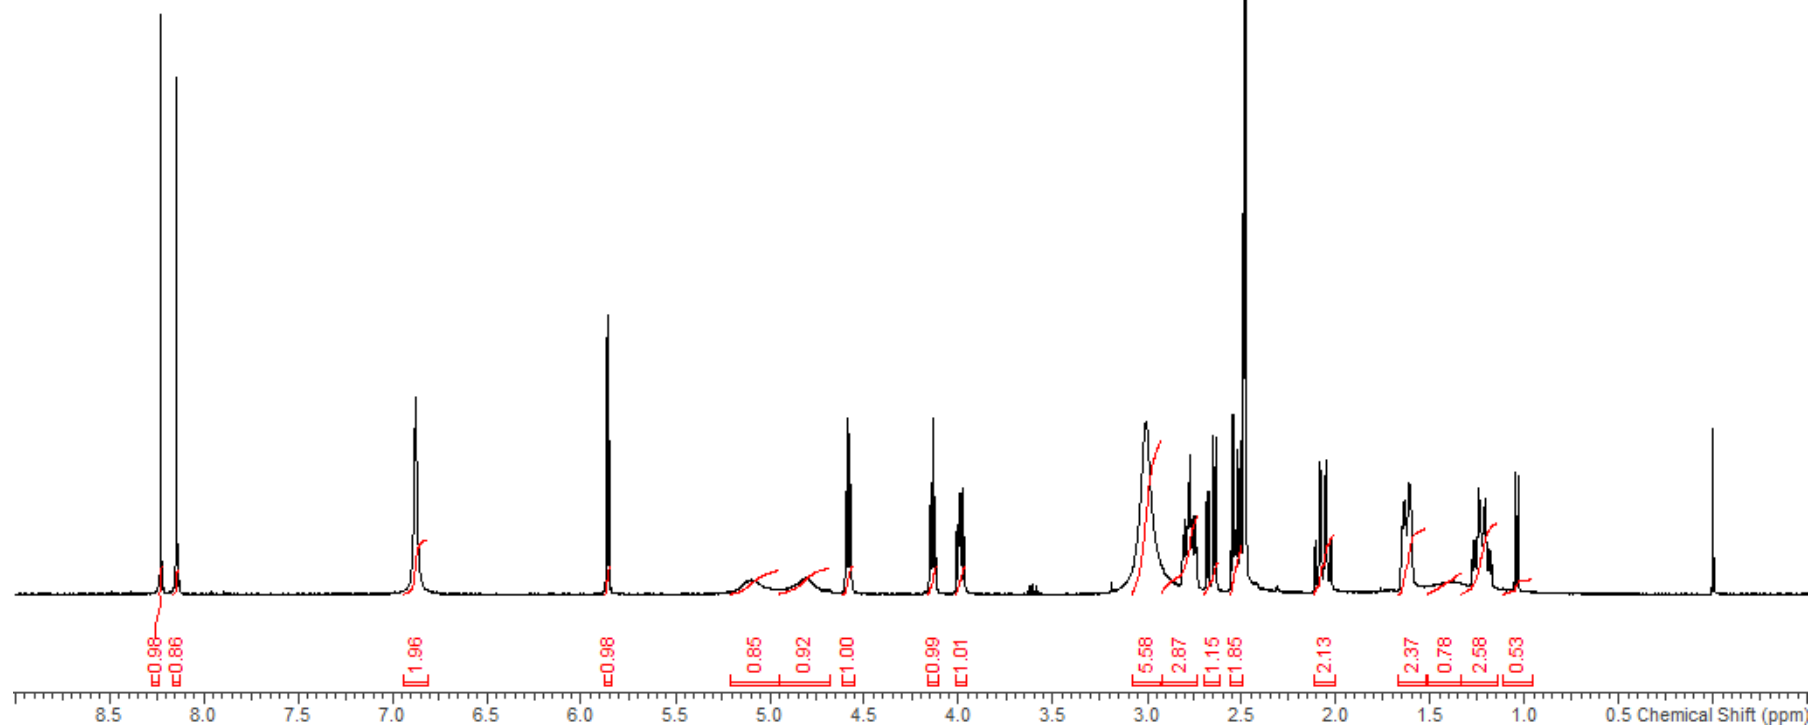

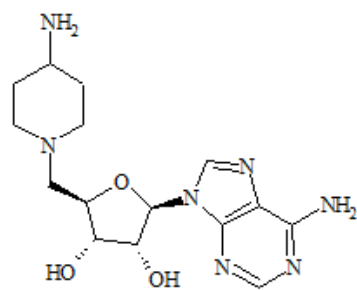

**1**

DMSO-*d*<sub>6</sub>

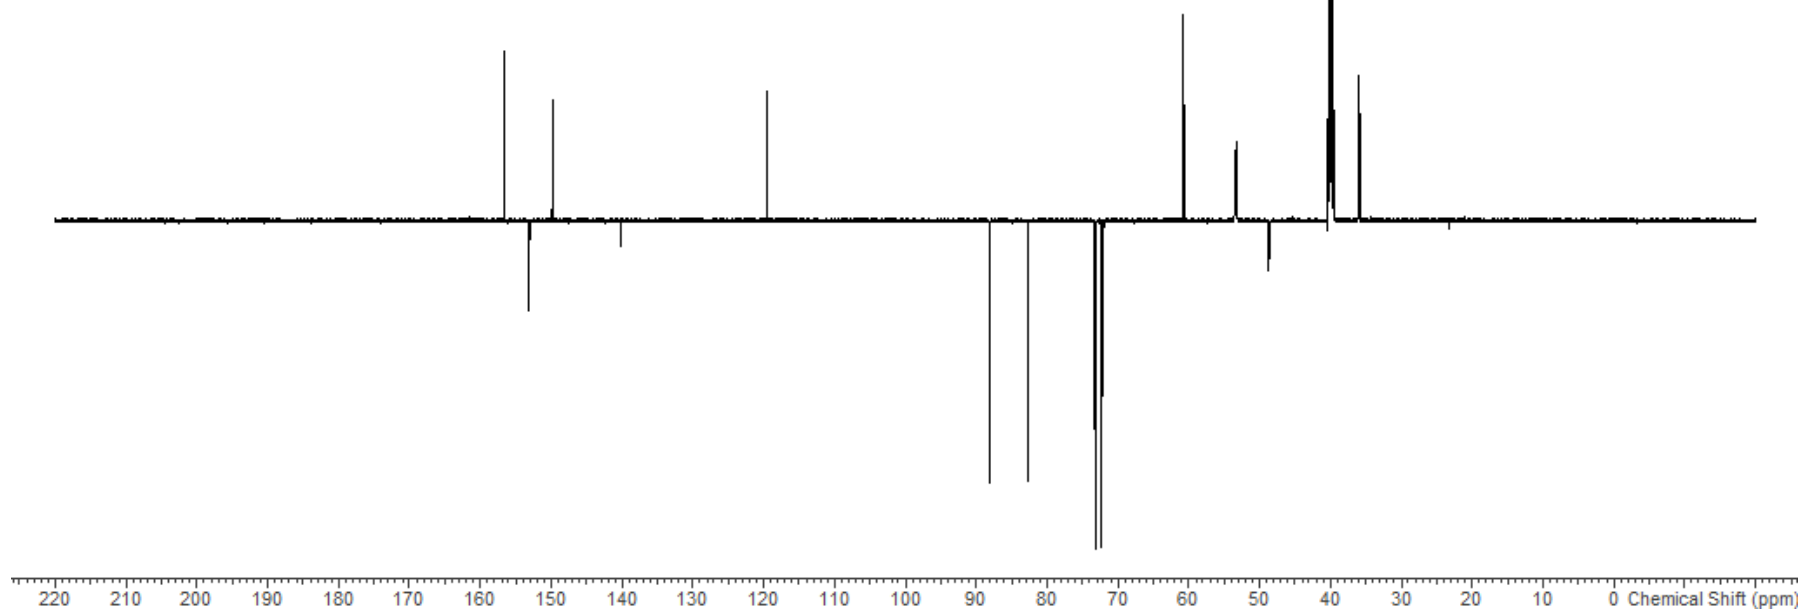

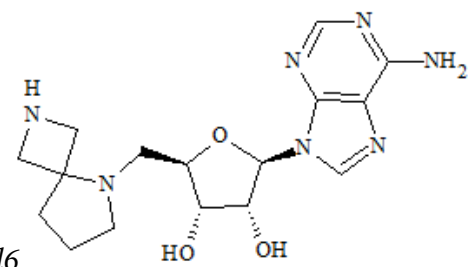

2

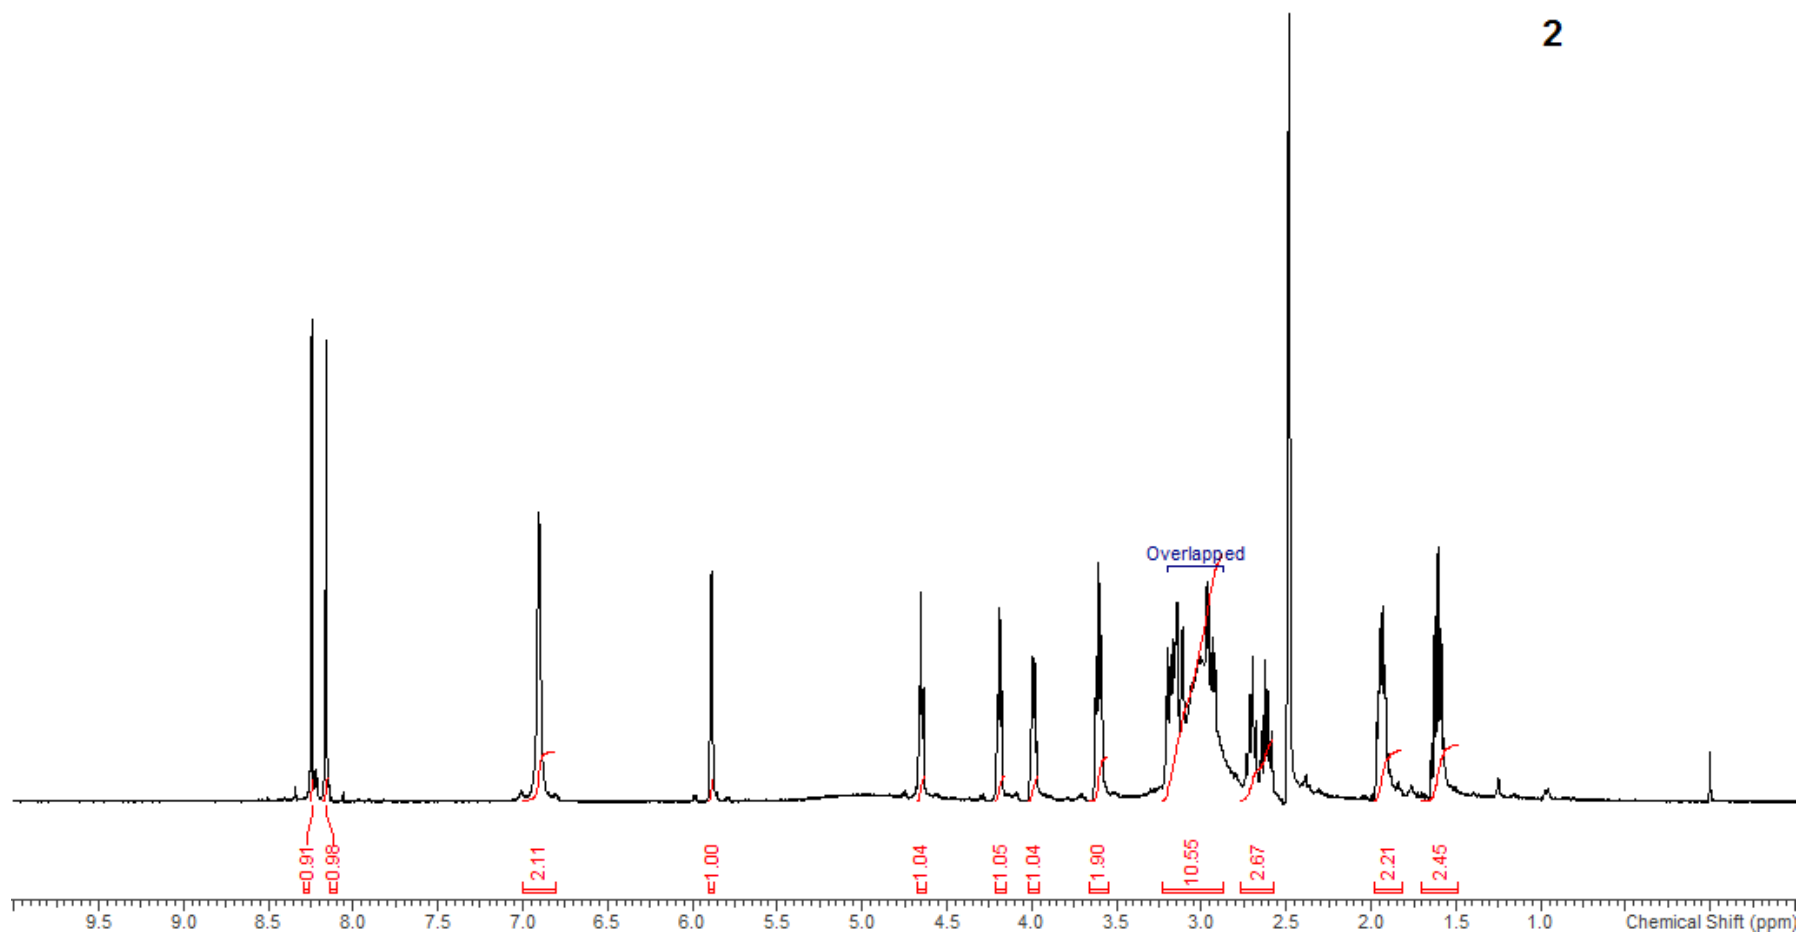

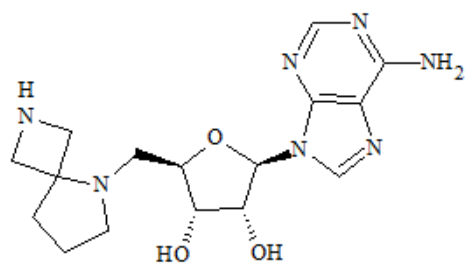

2

DMSO-*d*<sub>6</sub>

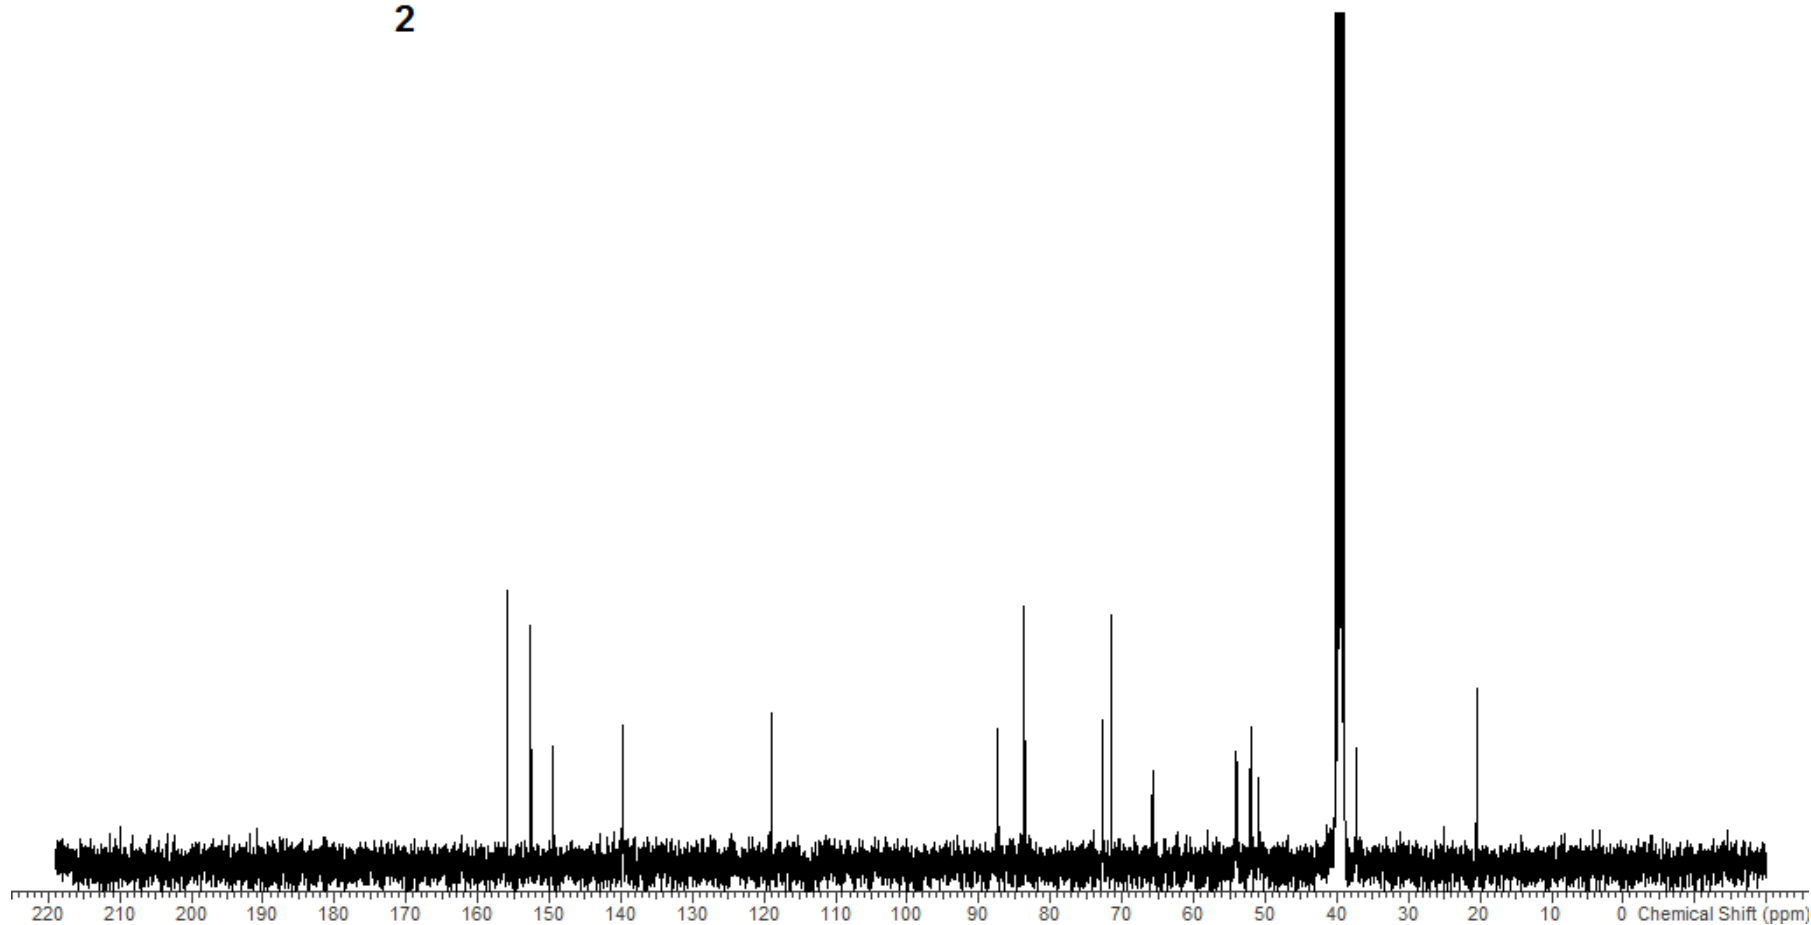

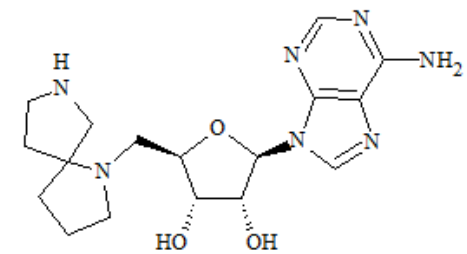

**3a**

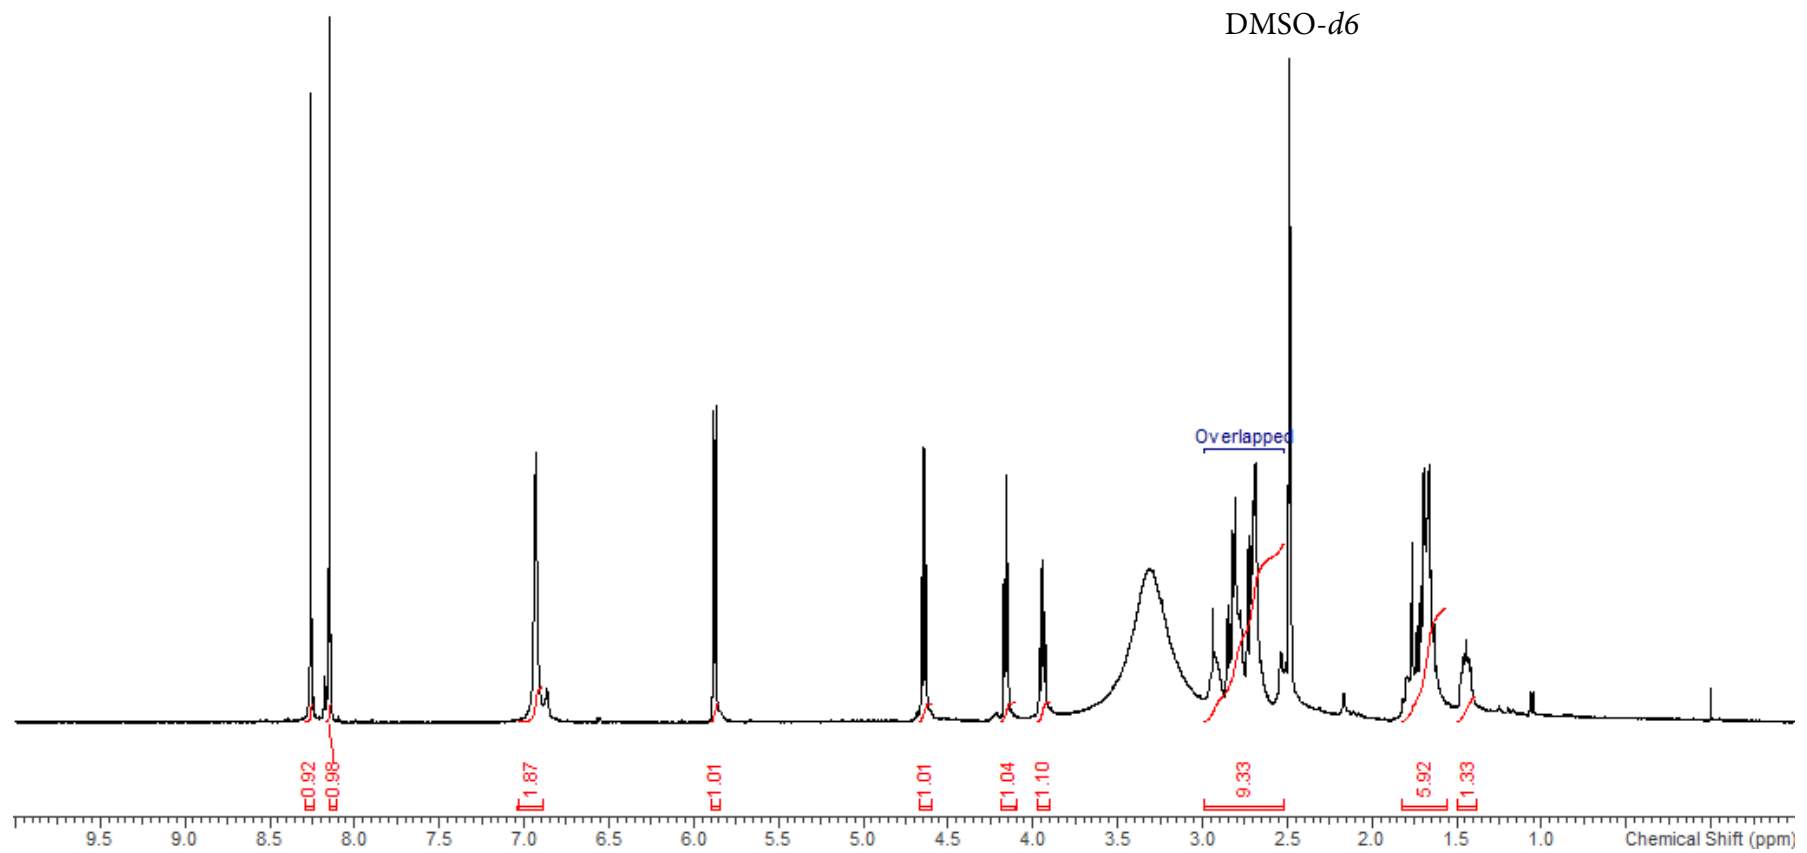

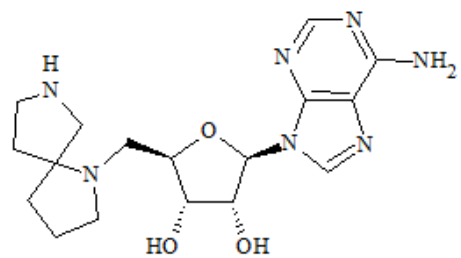

**3a**

DMSO-*d*<sub>6</sub>

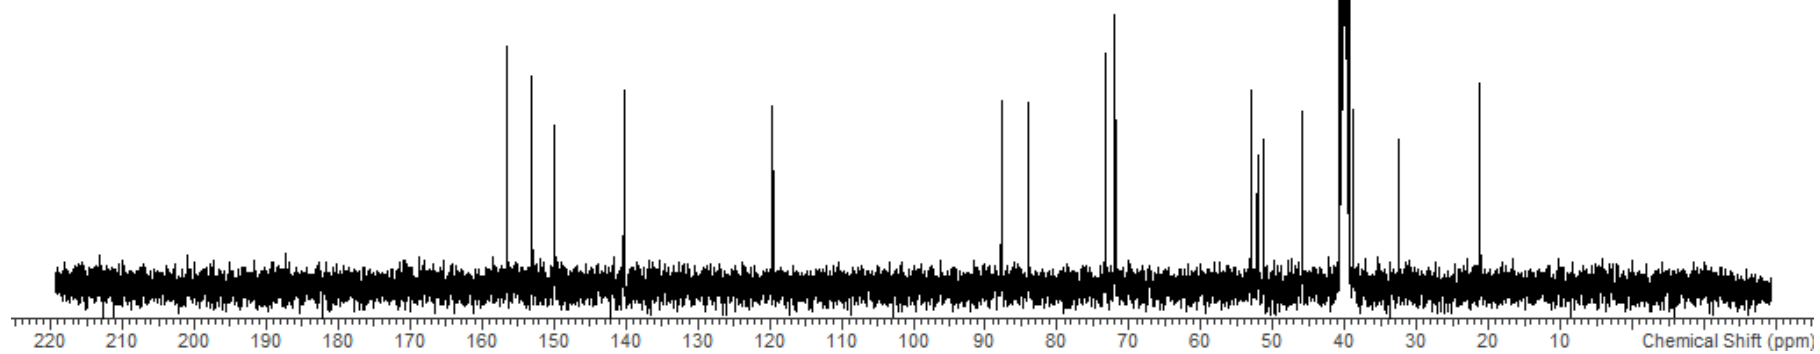

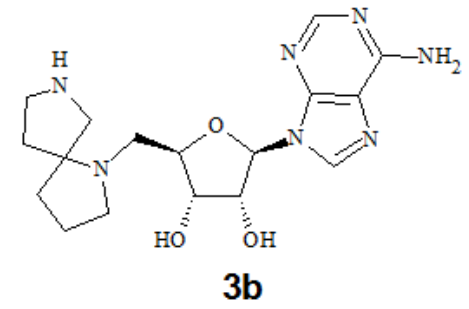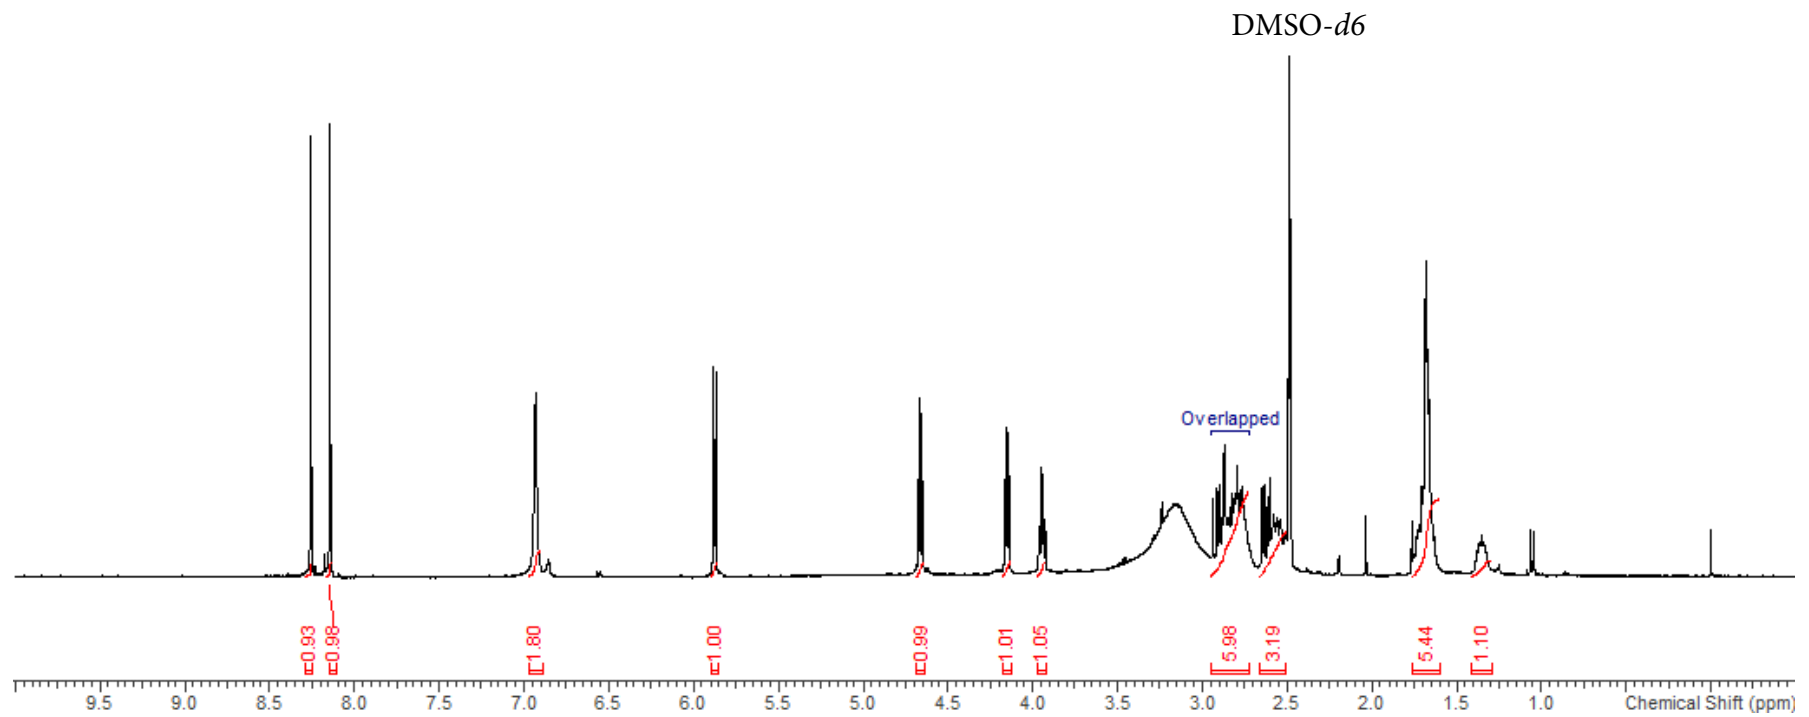

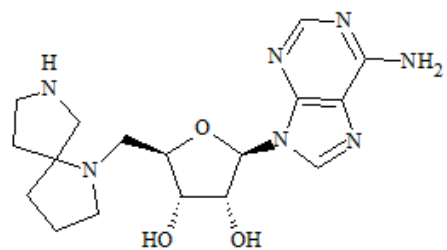

**3b**

DMSO-*d*<sub>6</sub>

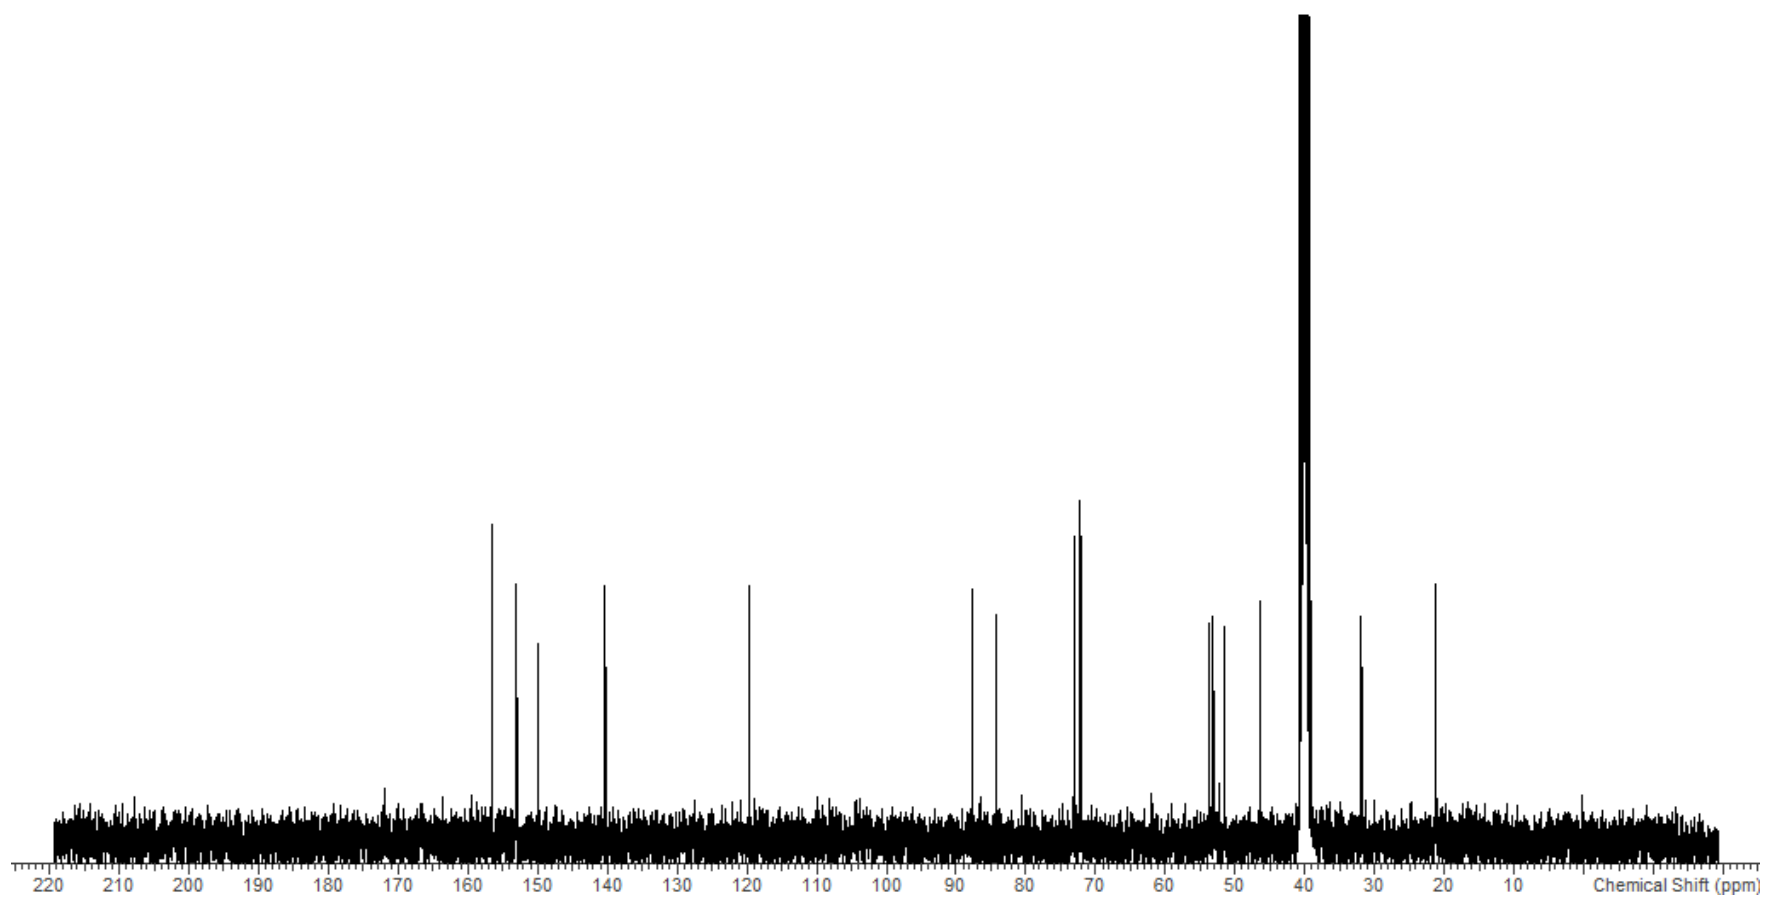



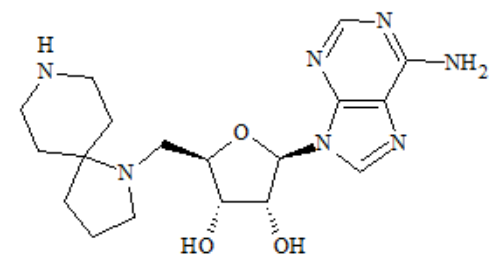

**4**

DMSO-*d*<sub>6</sub>

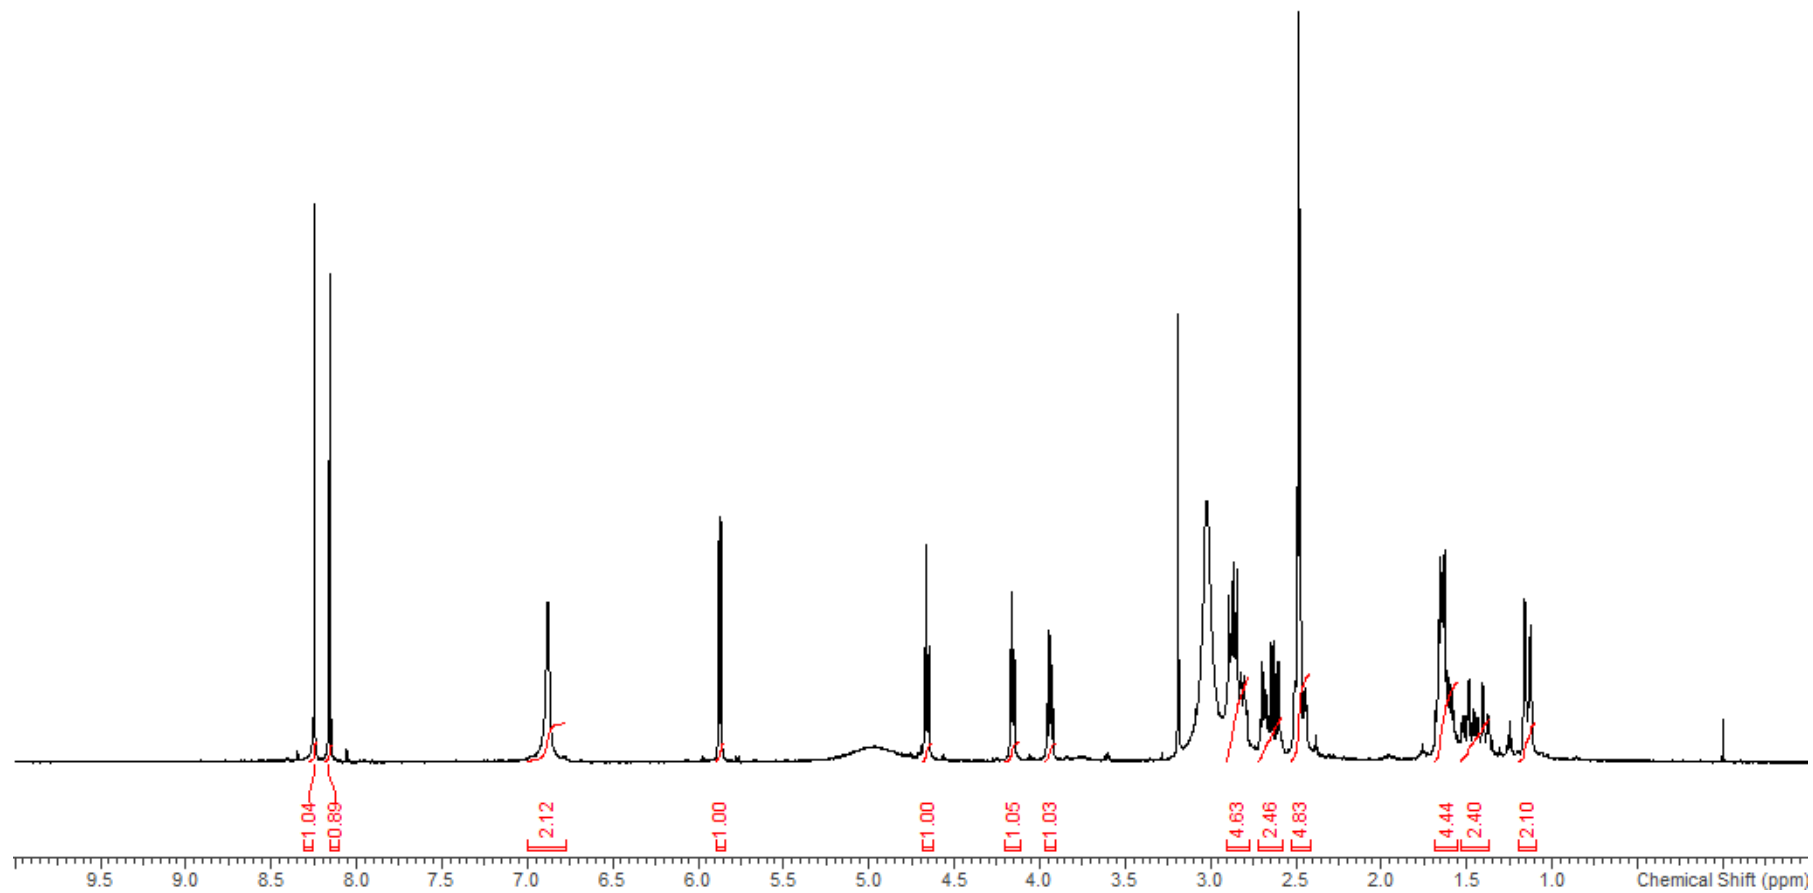

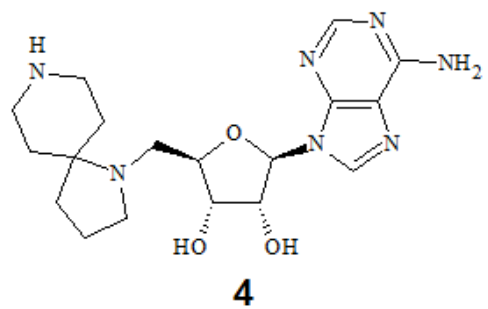

DMSO-*d*<sub>6</sub>

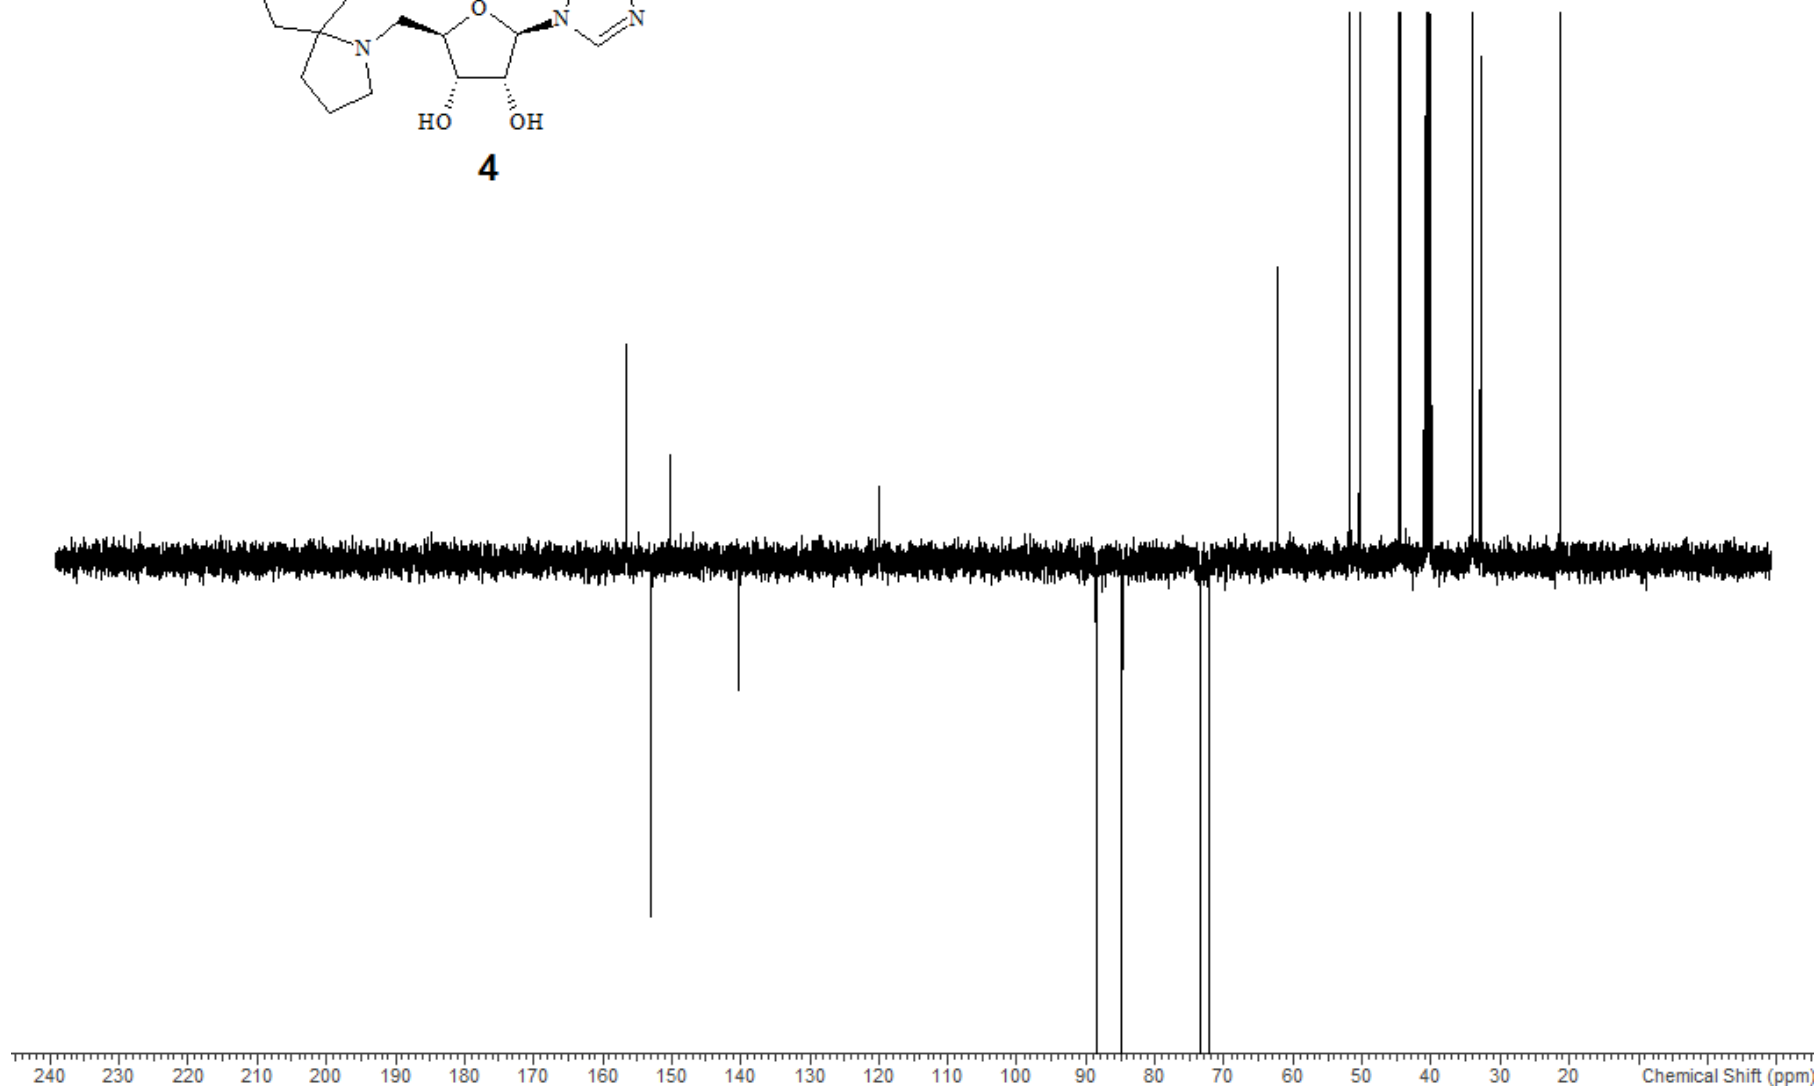

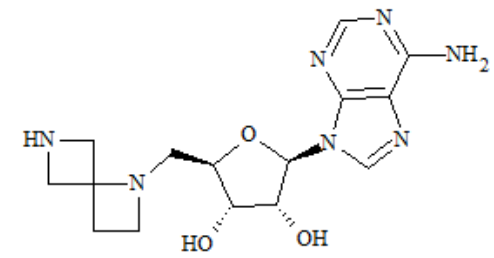

DMSO-*d*<sub>6</sub>

**5**

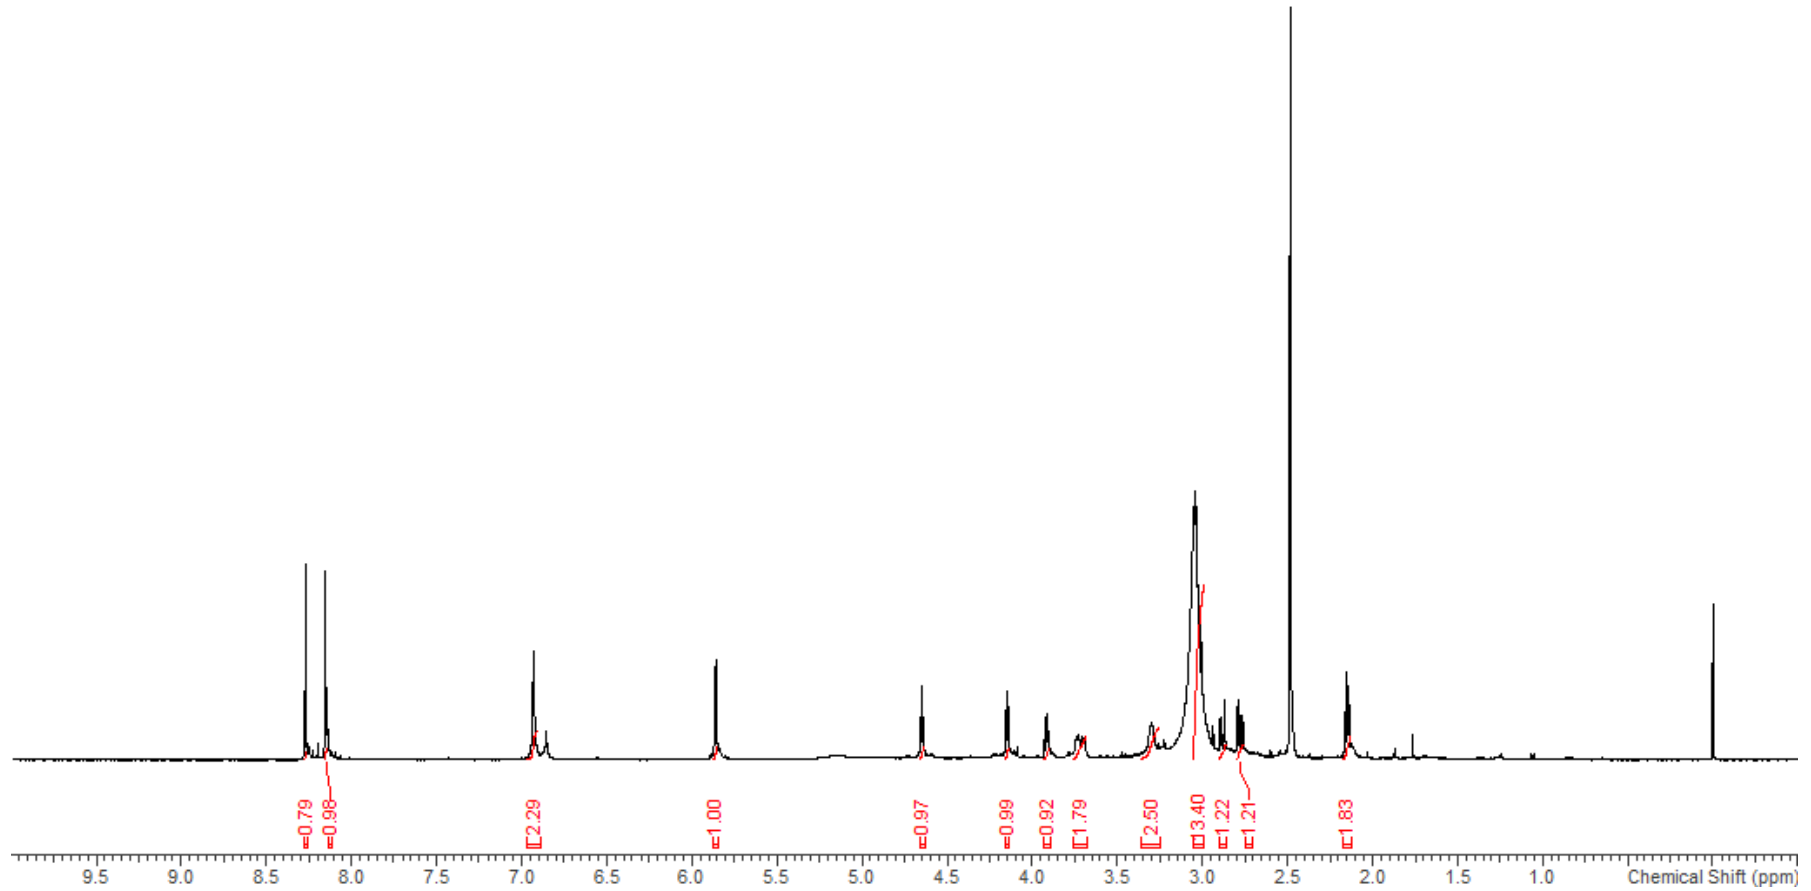

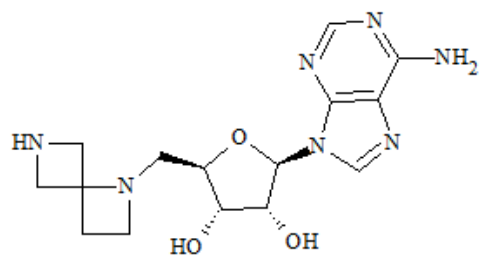

5

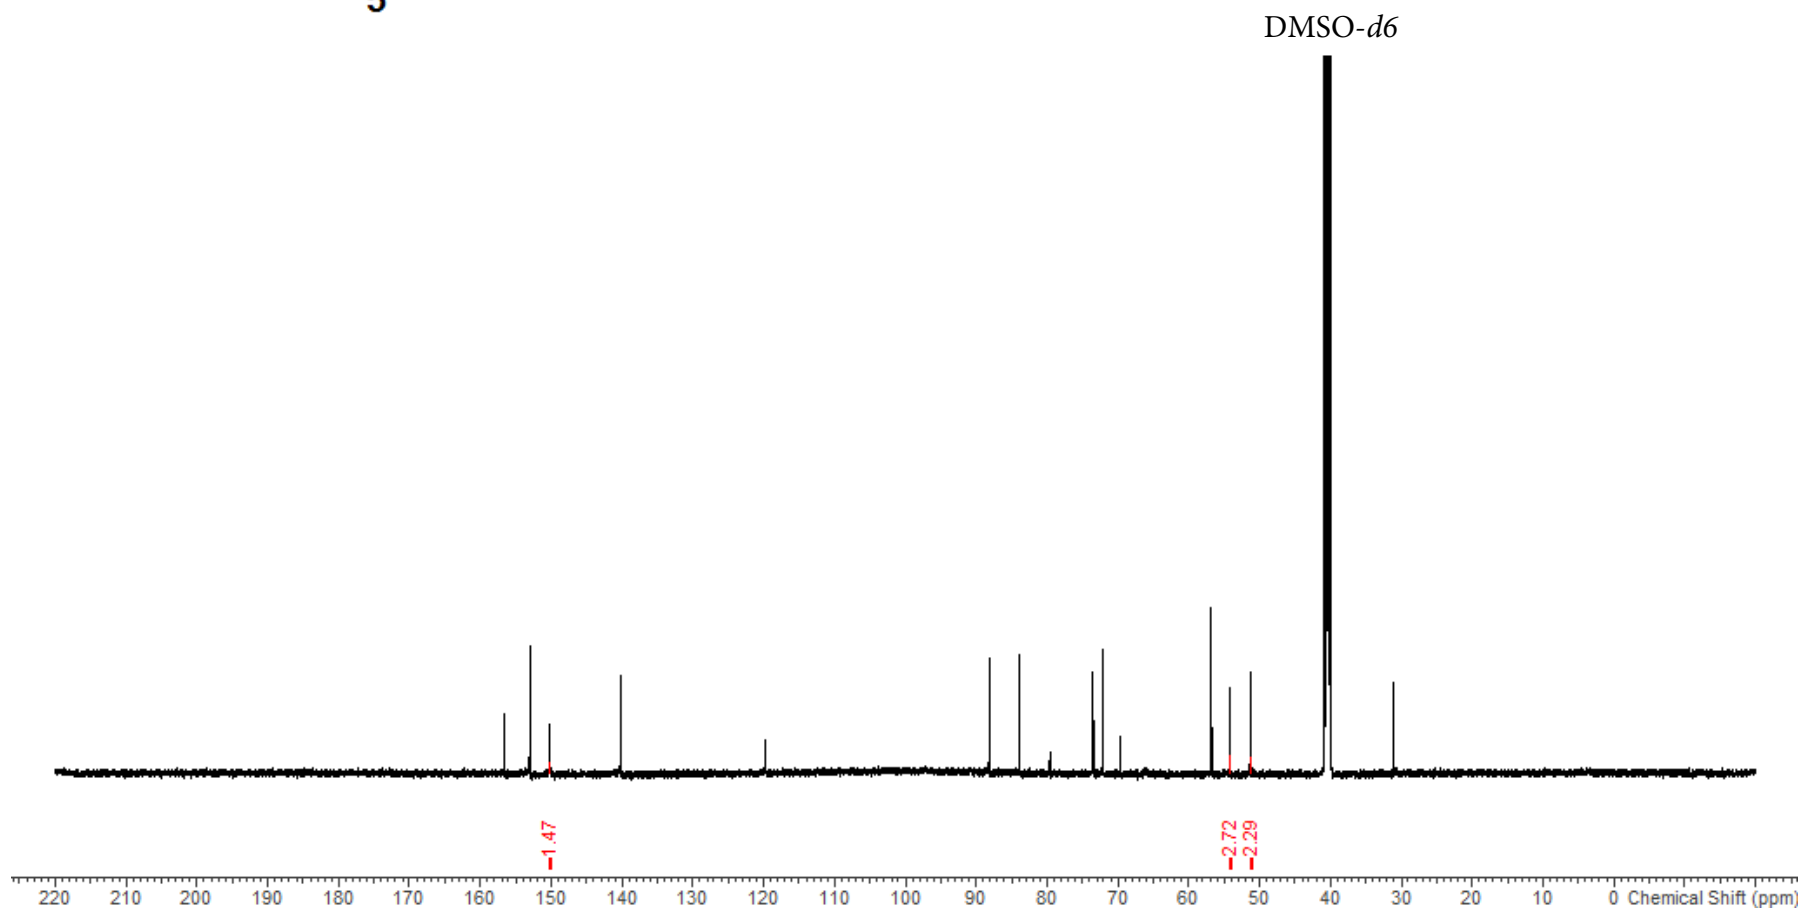

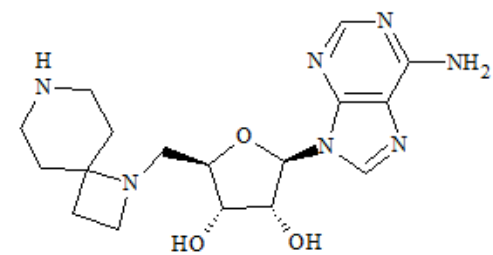

**6**

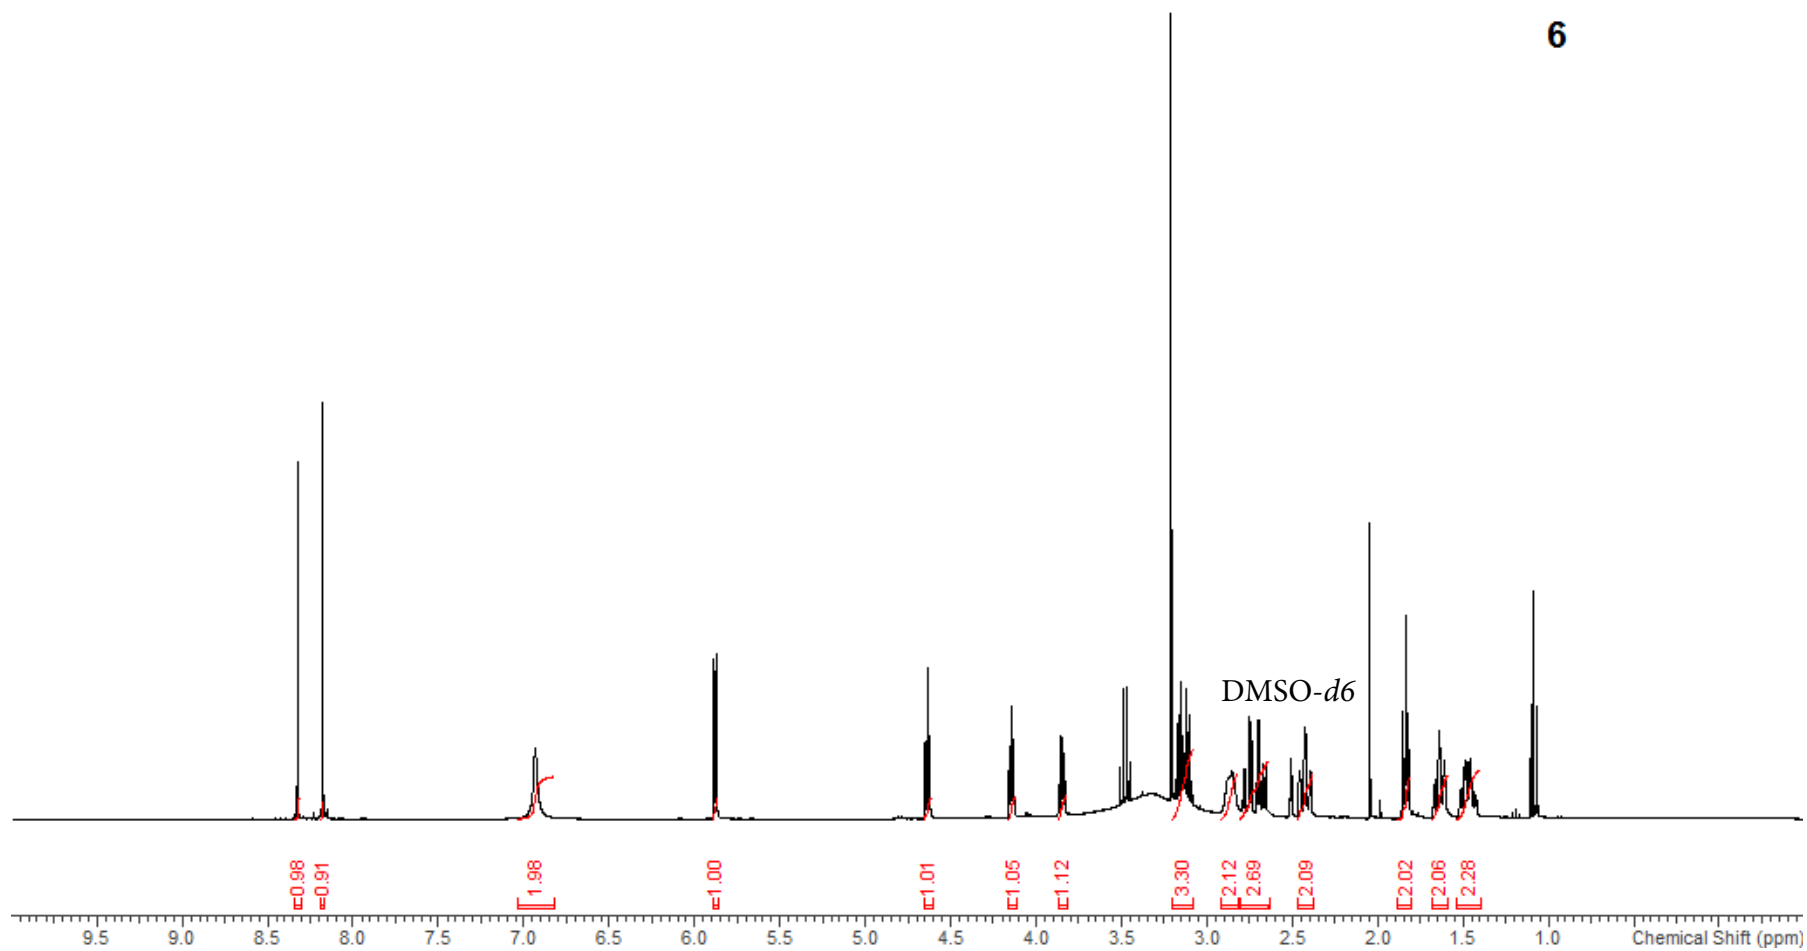

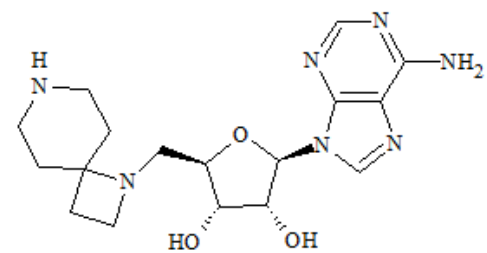

**6**

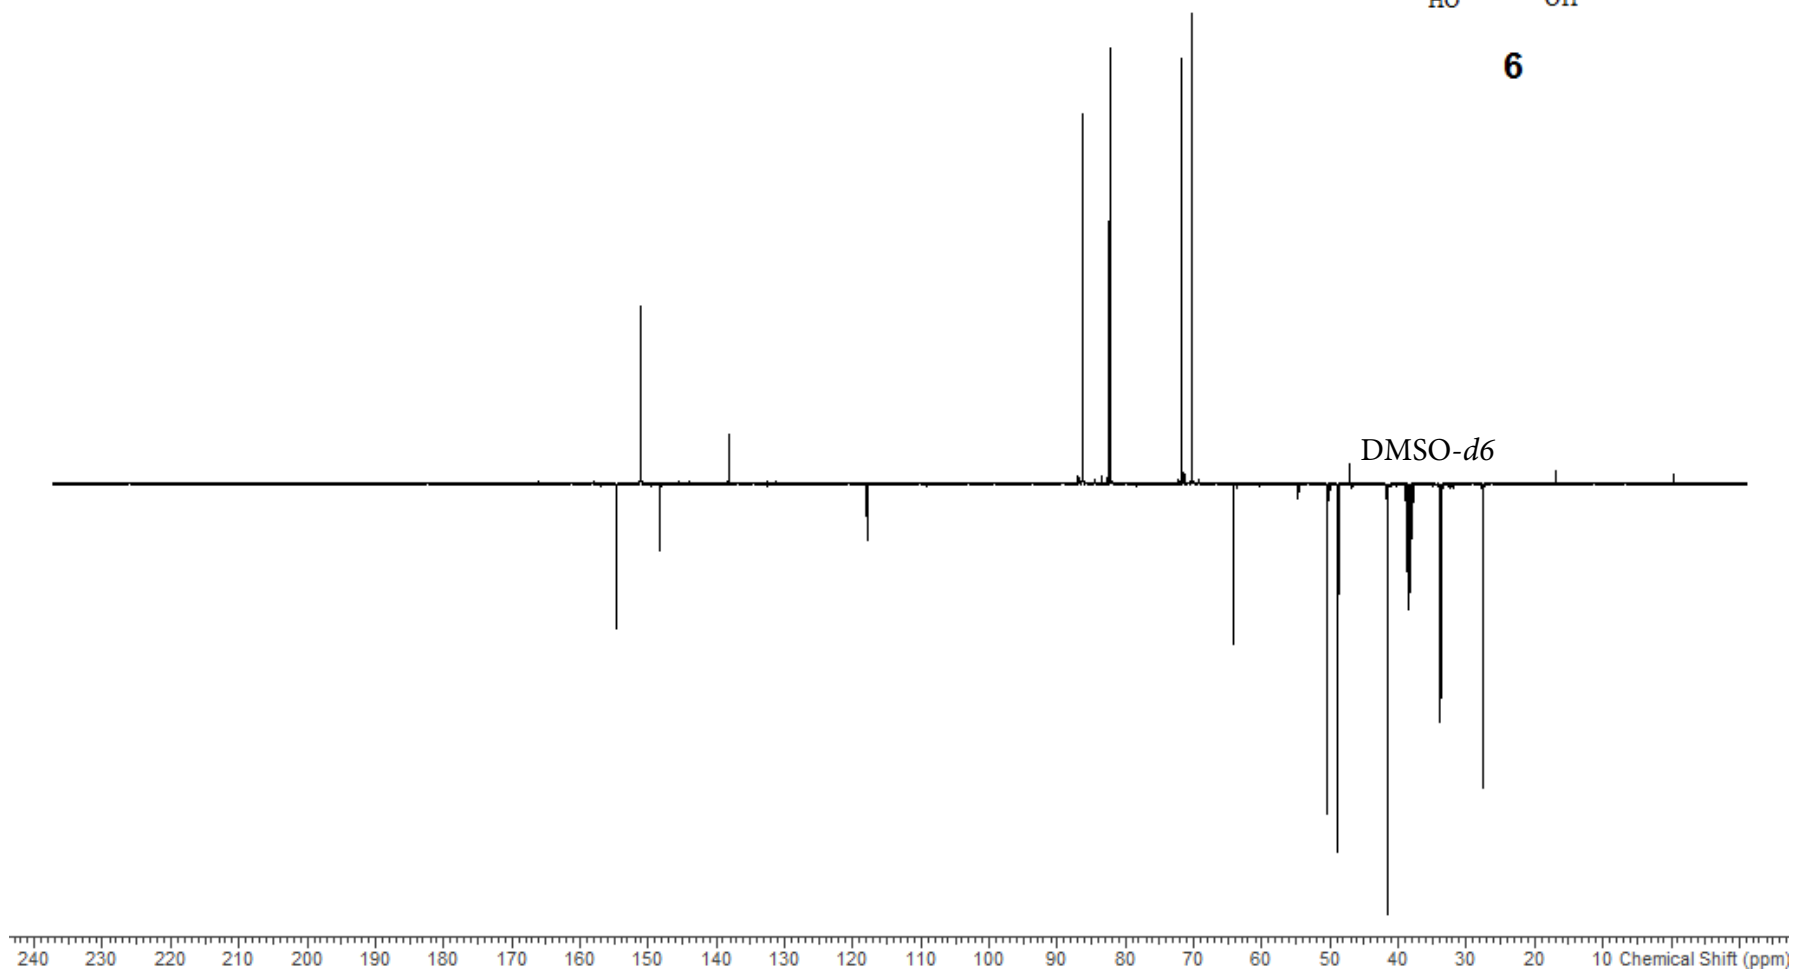

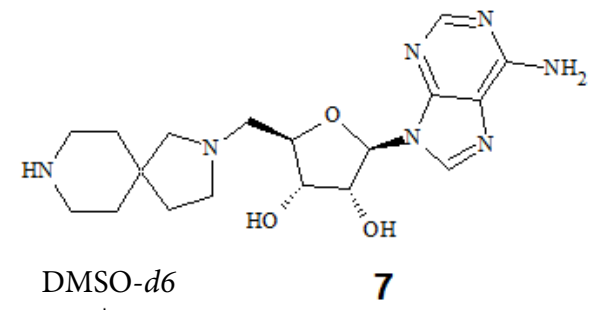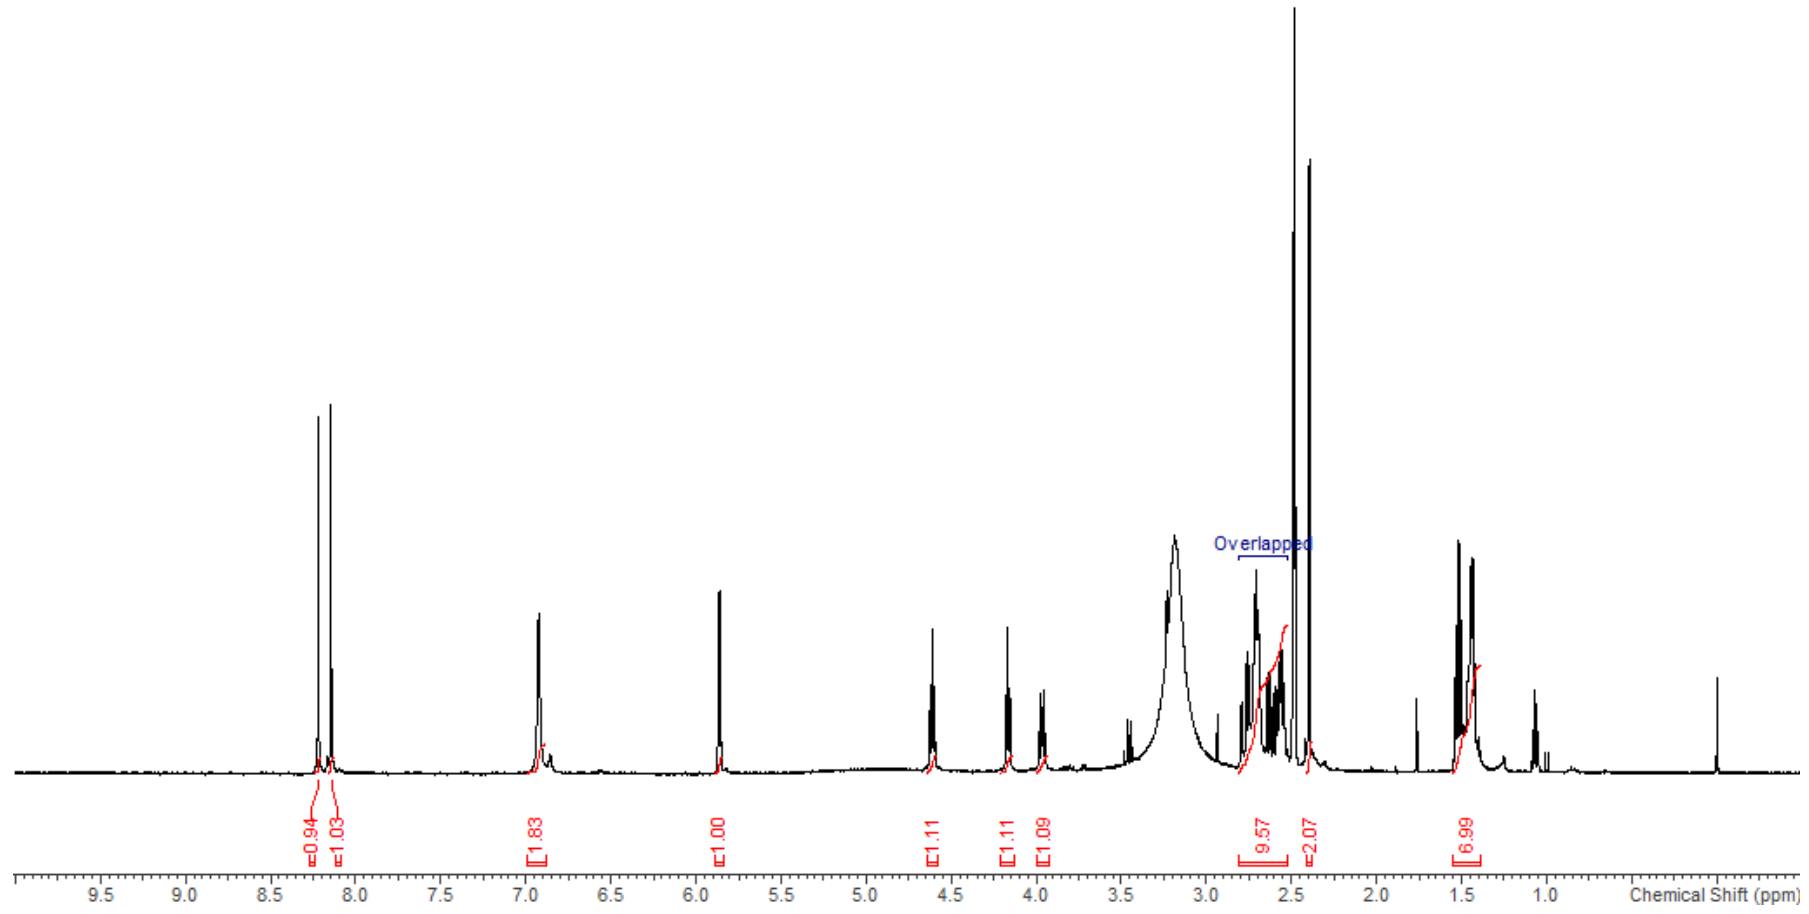

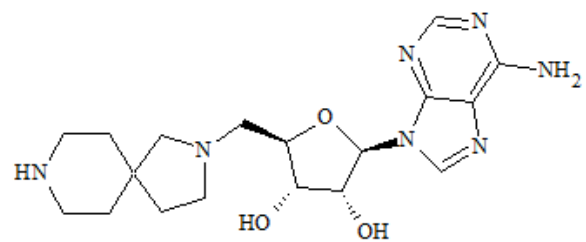

7

DMSO-*d*<sub>6</sub>

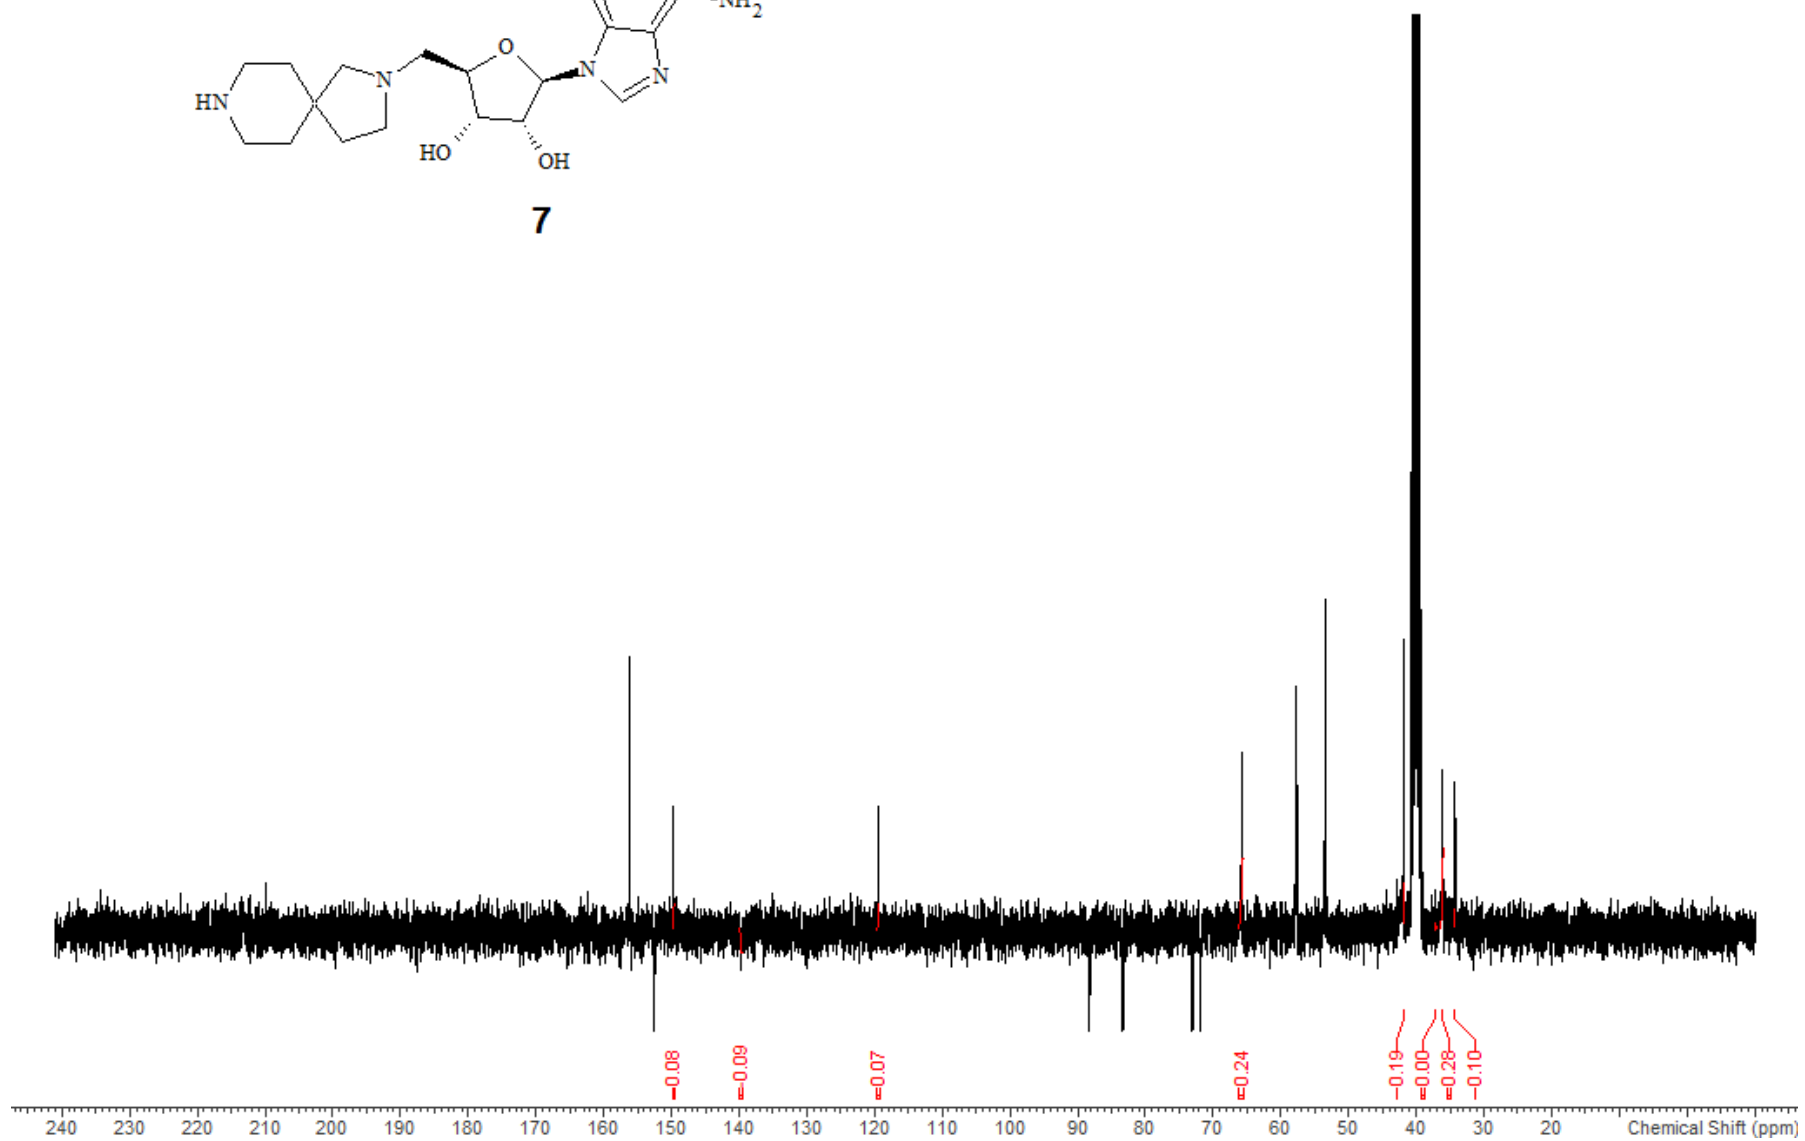



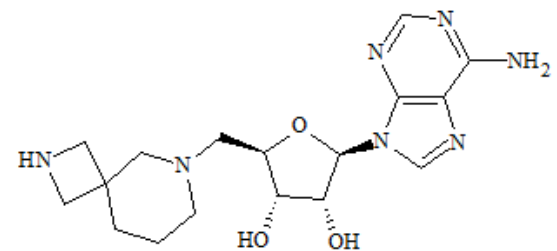

**8**

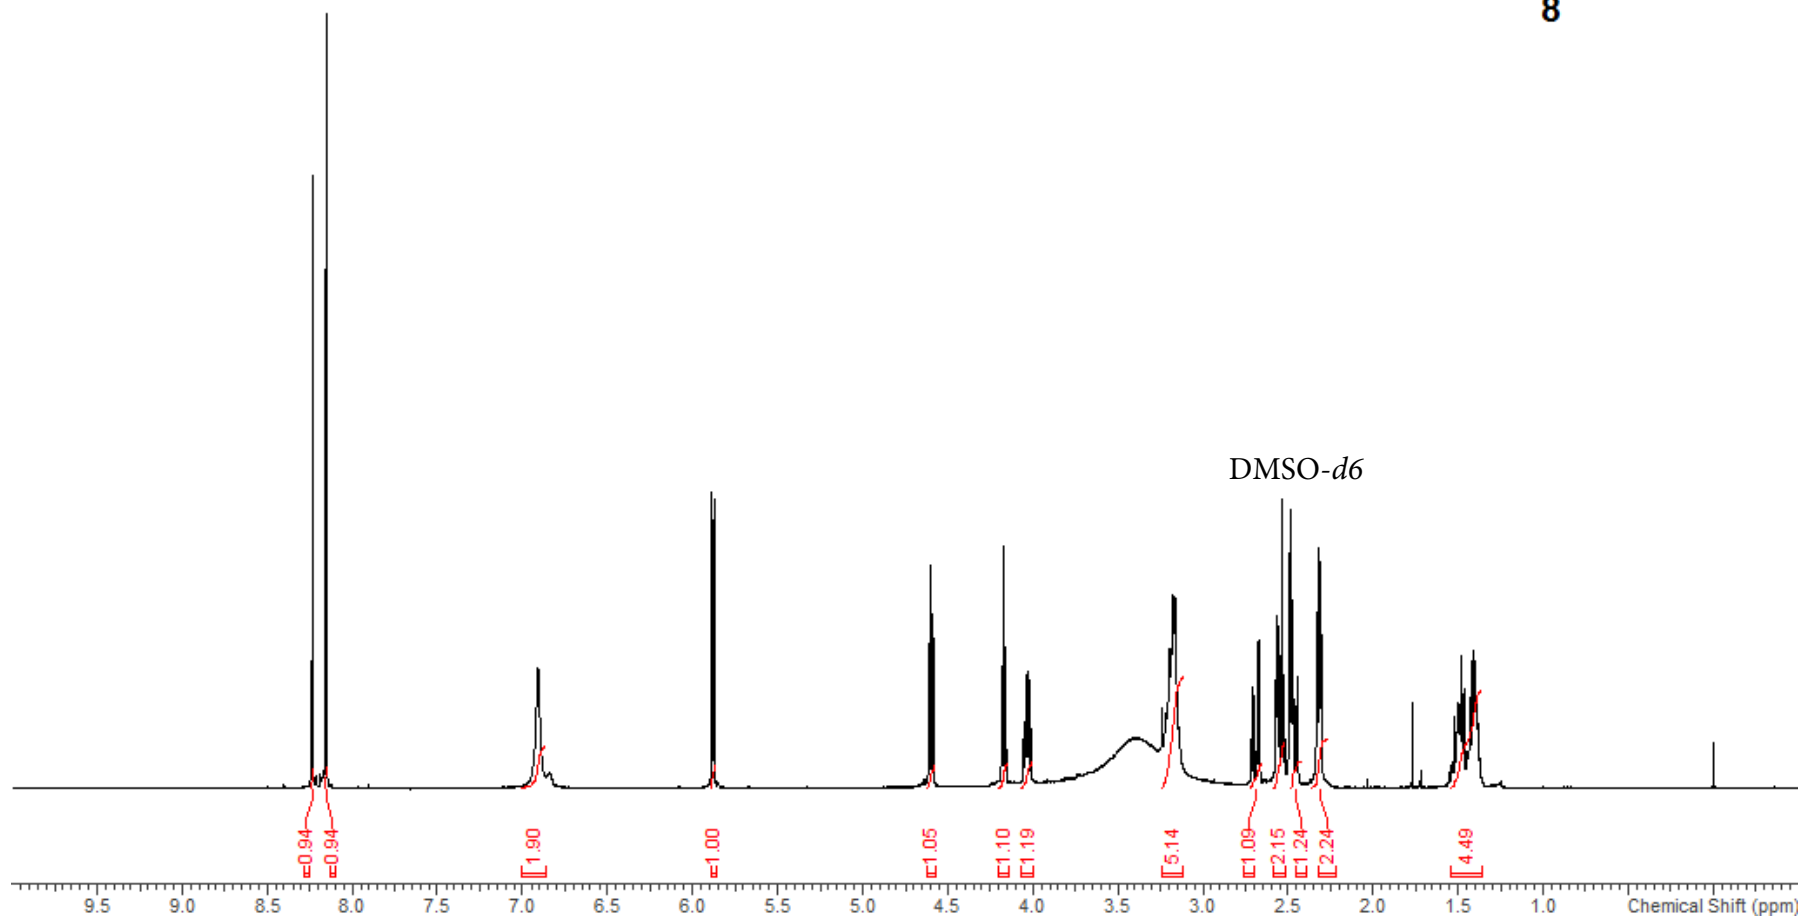

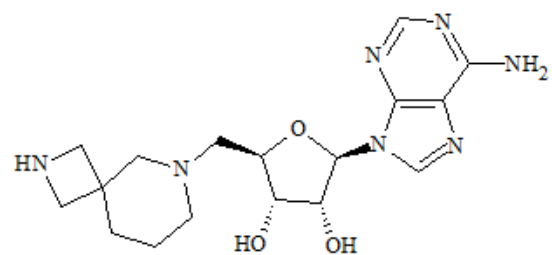

**8**

DMSO-*d*<sub>6</sub>

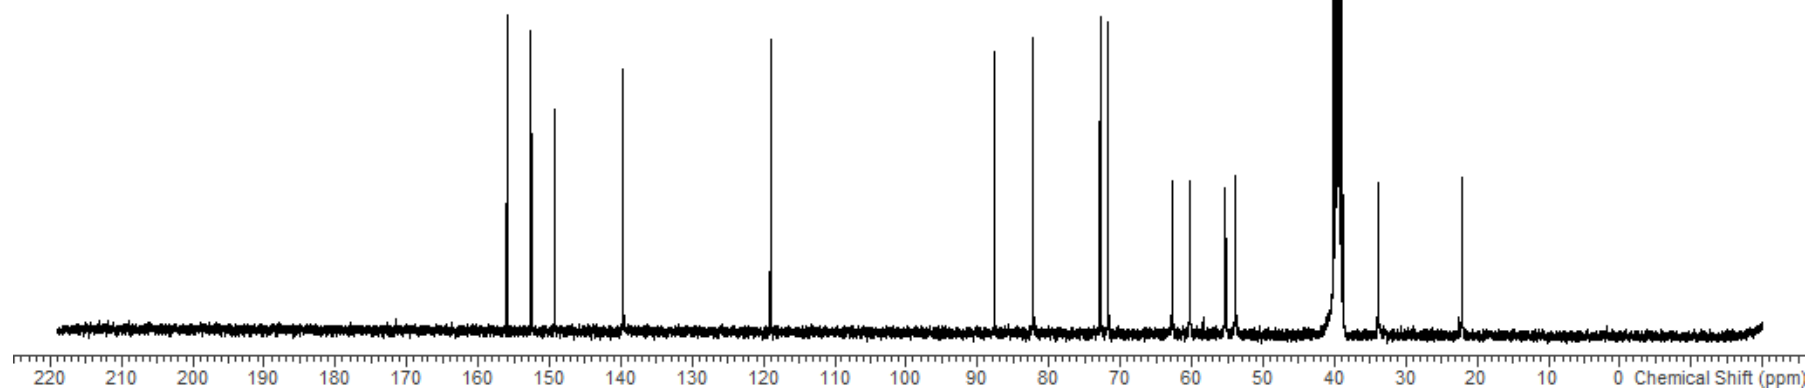

DMSO-*d*<sub>6</sub>

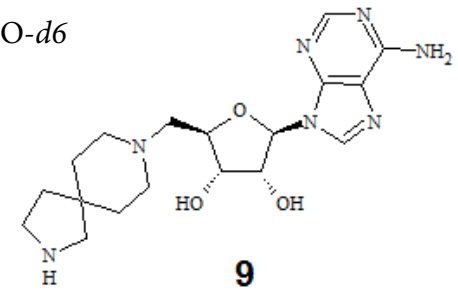

**9**

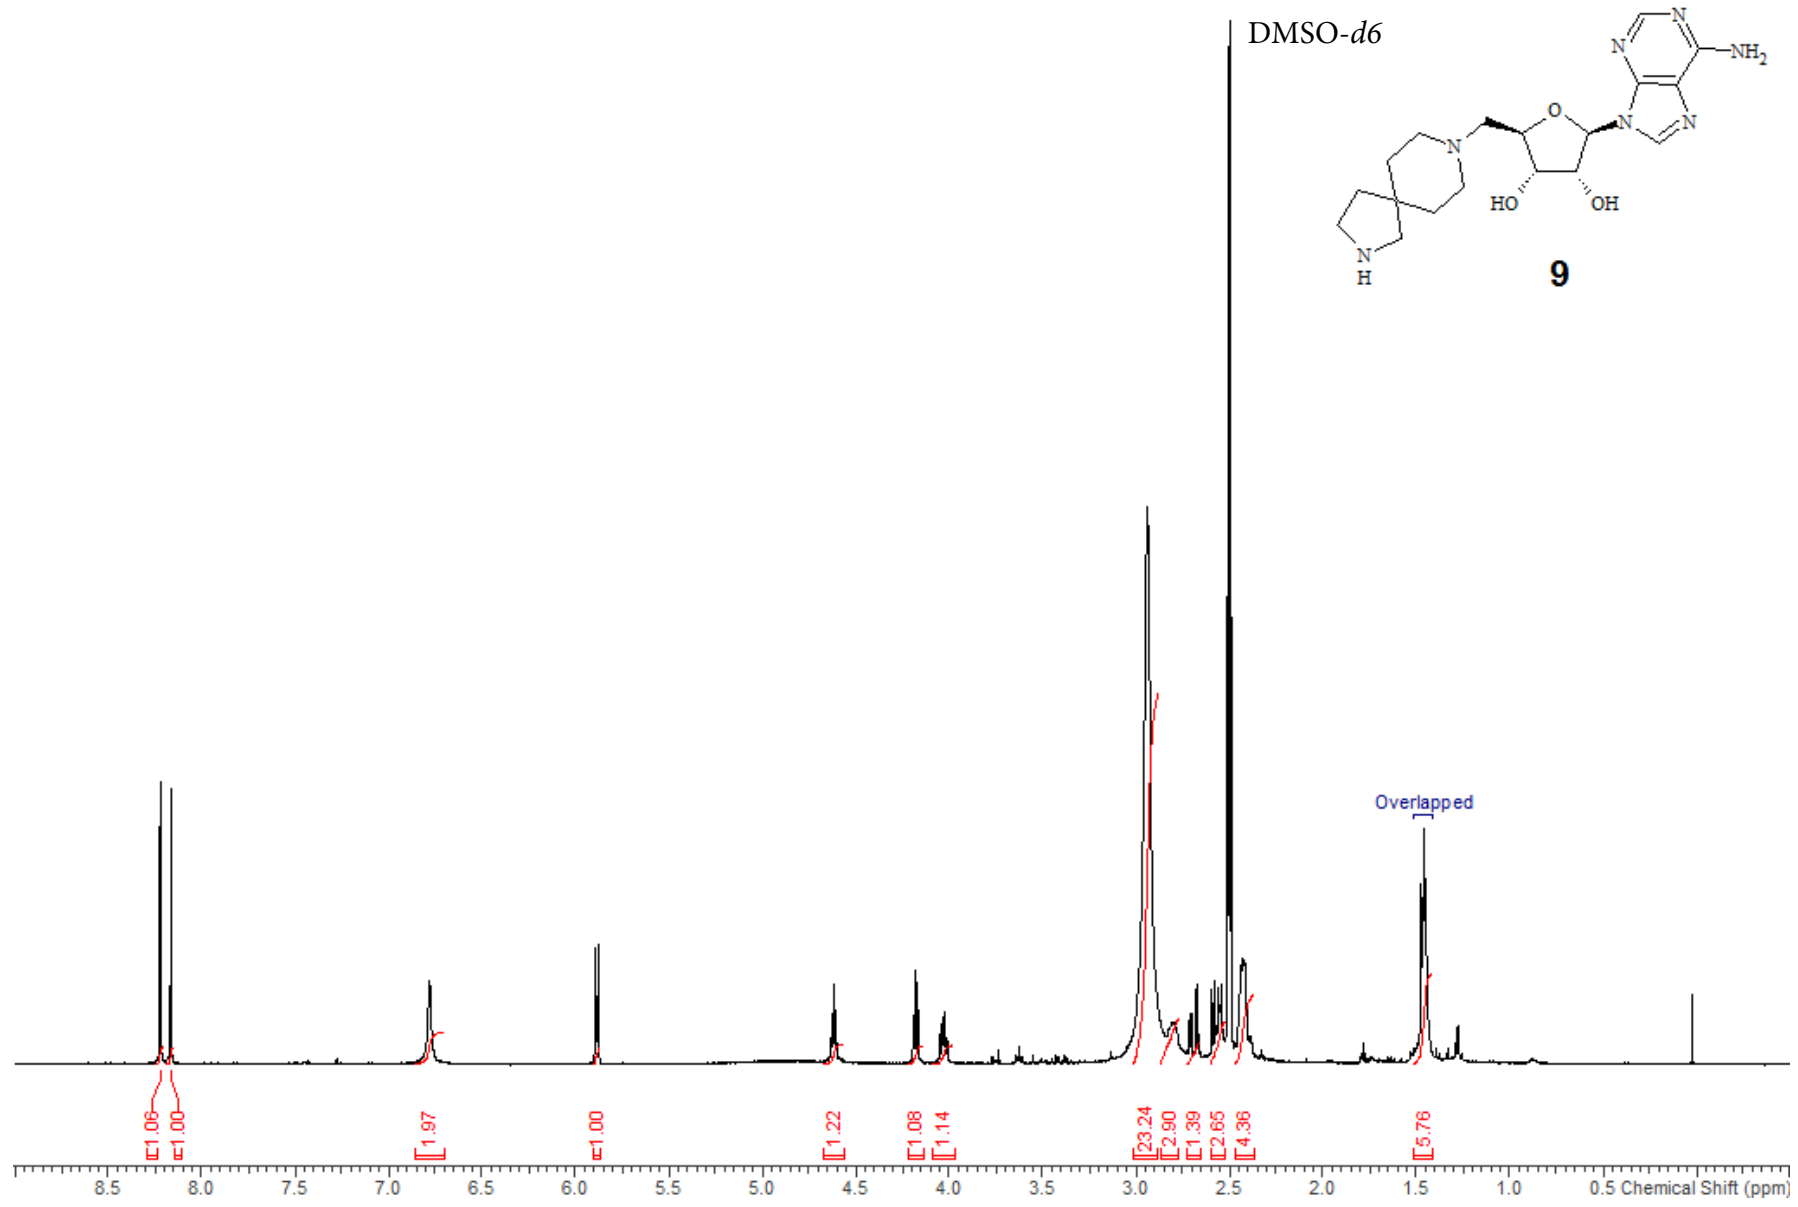

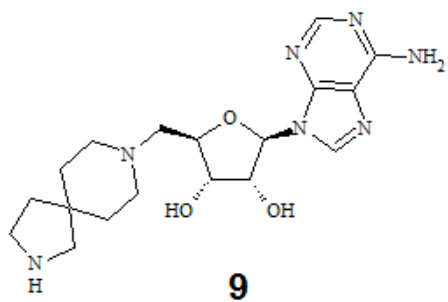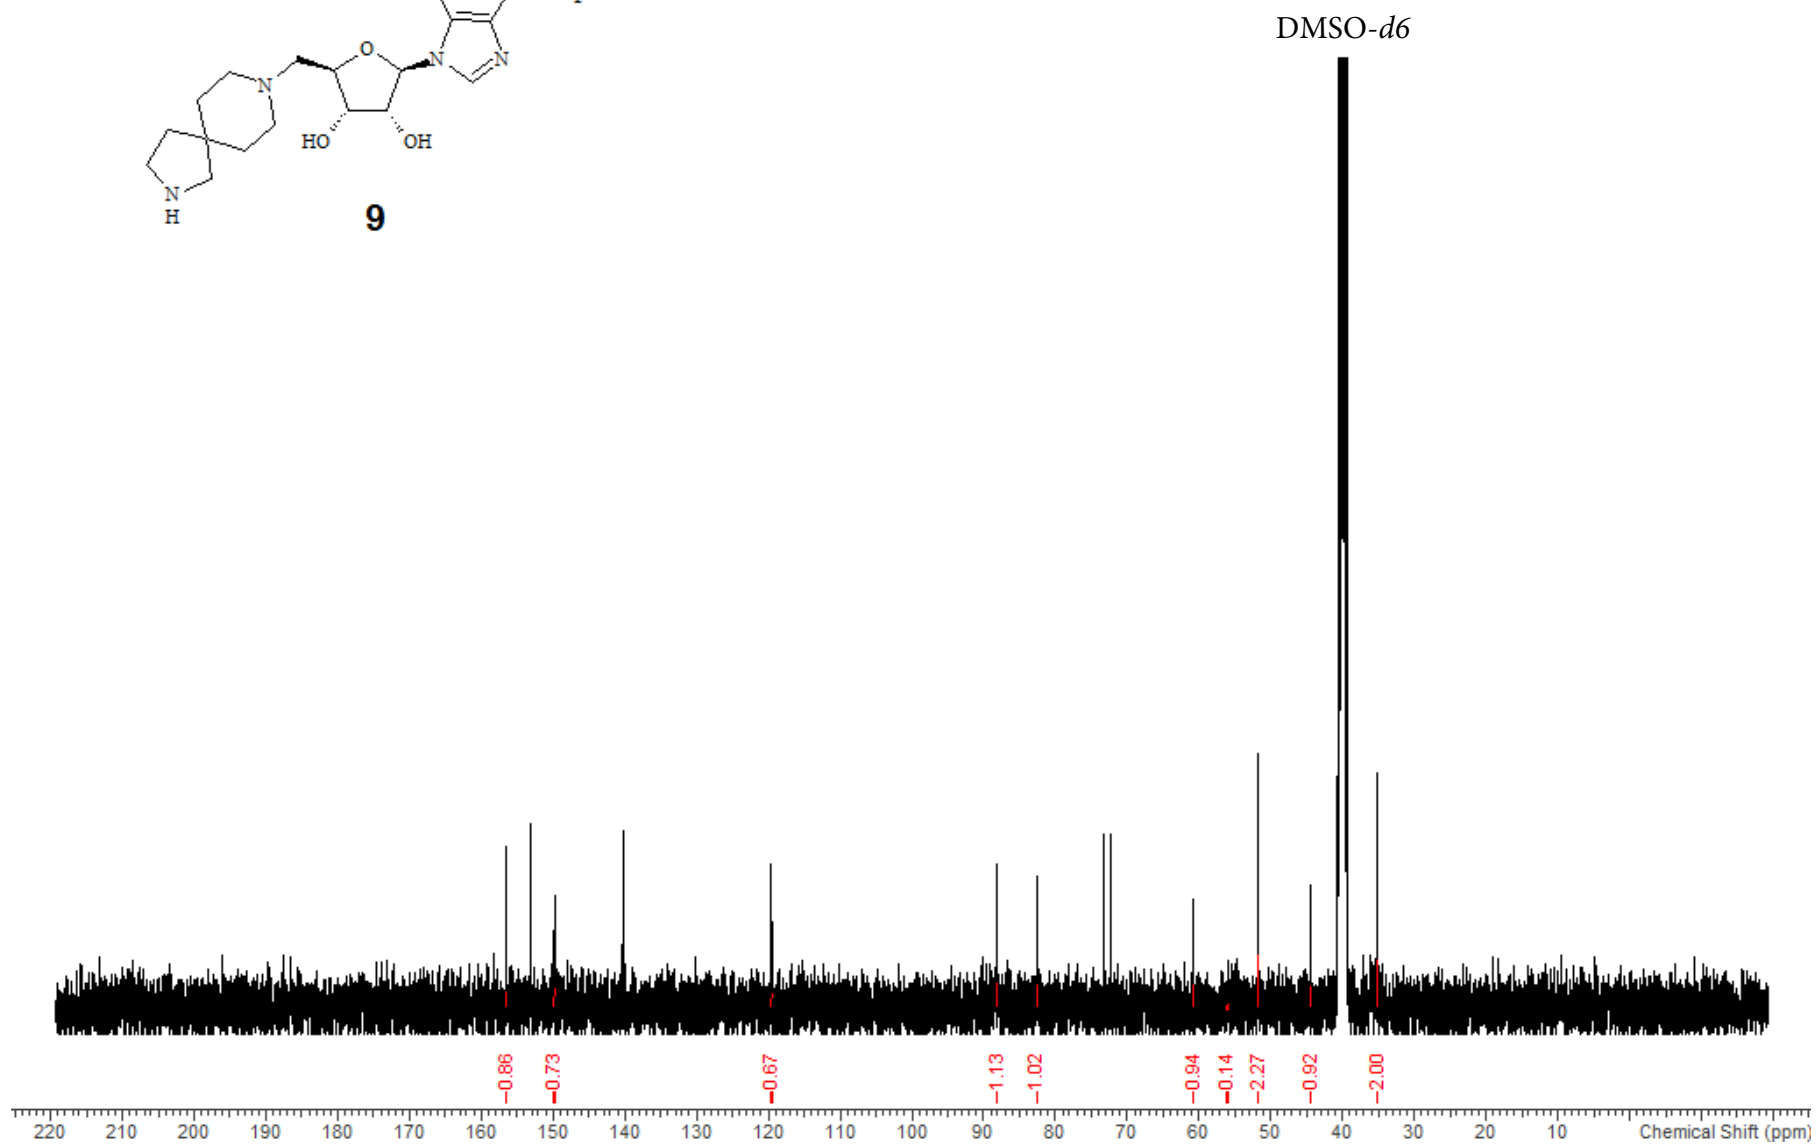

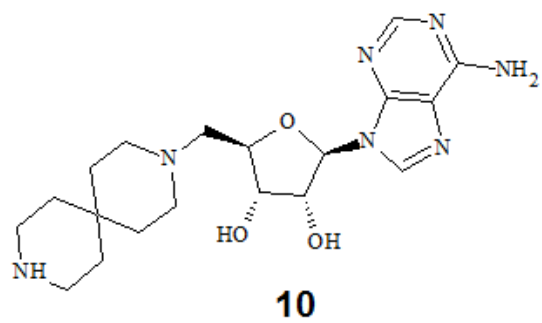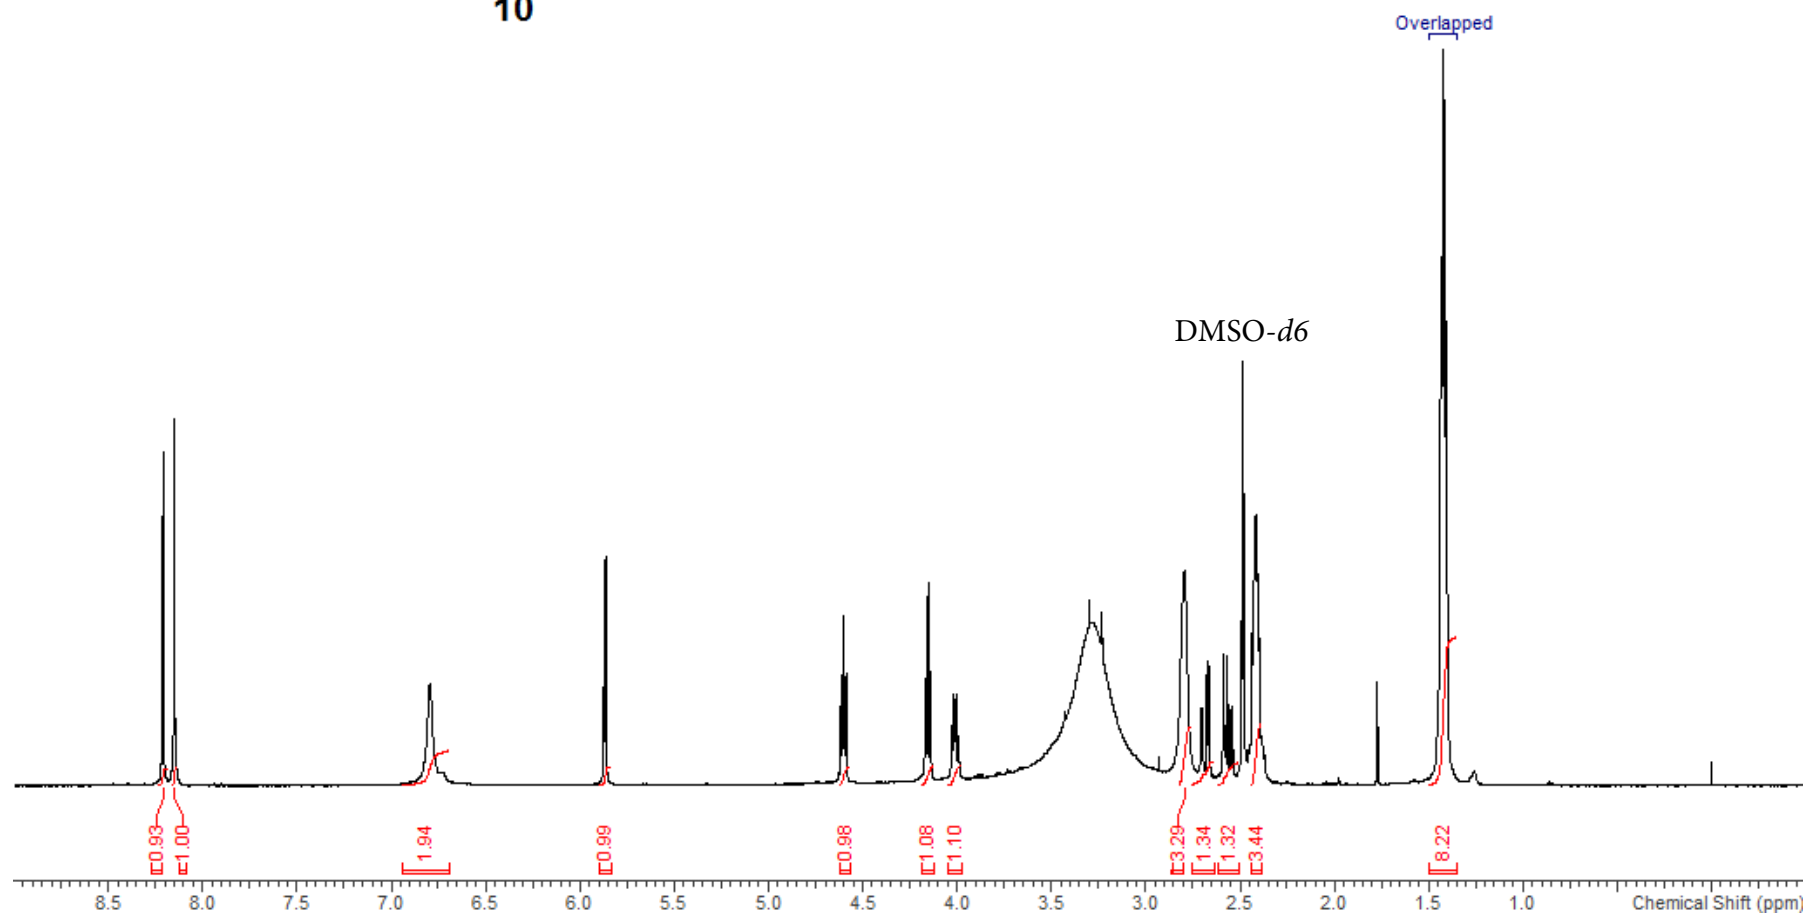

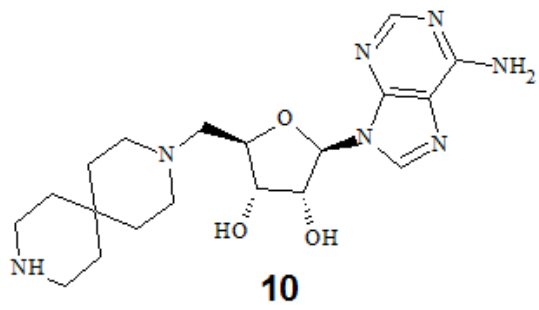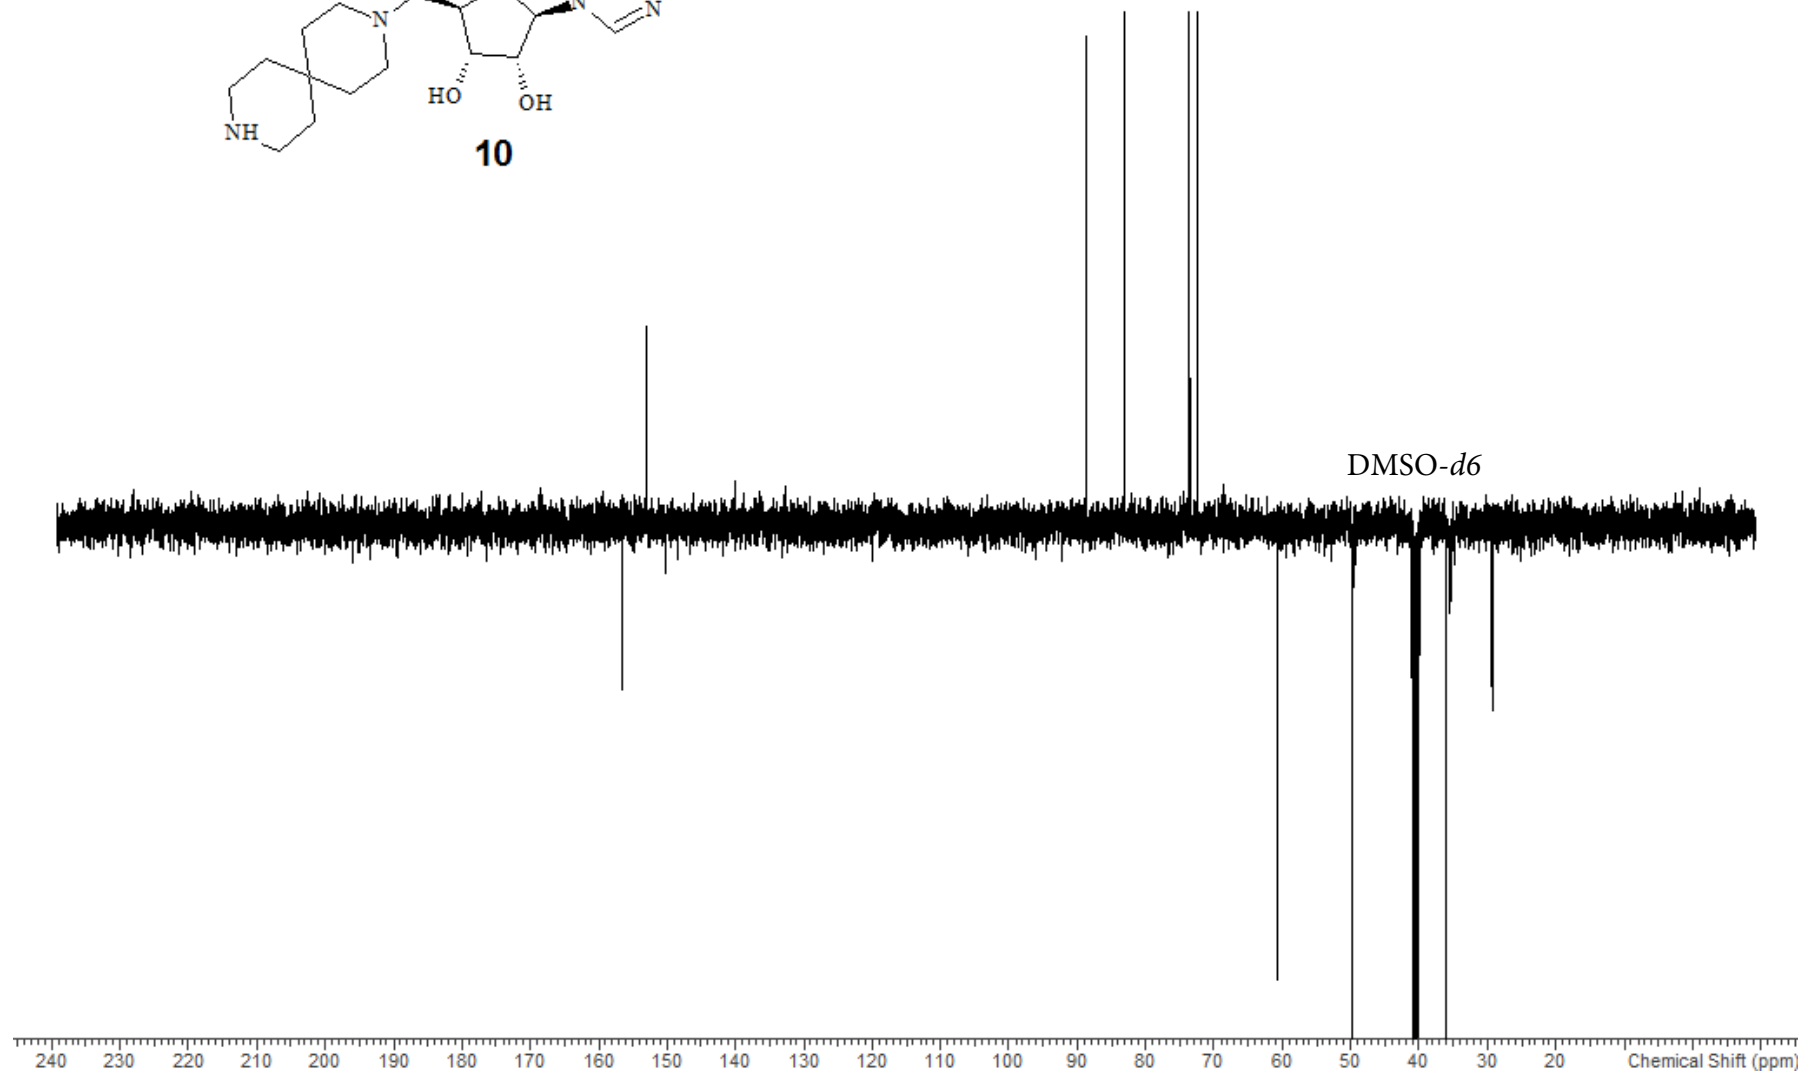

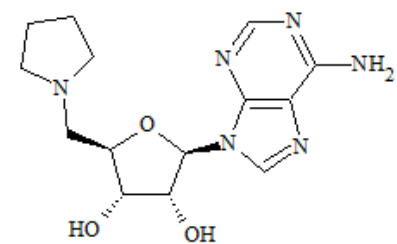

11

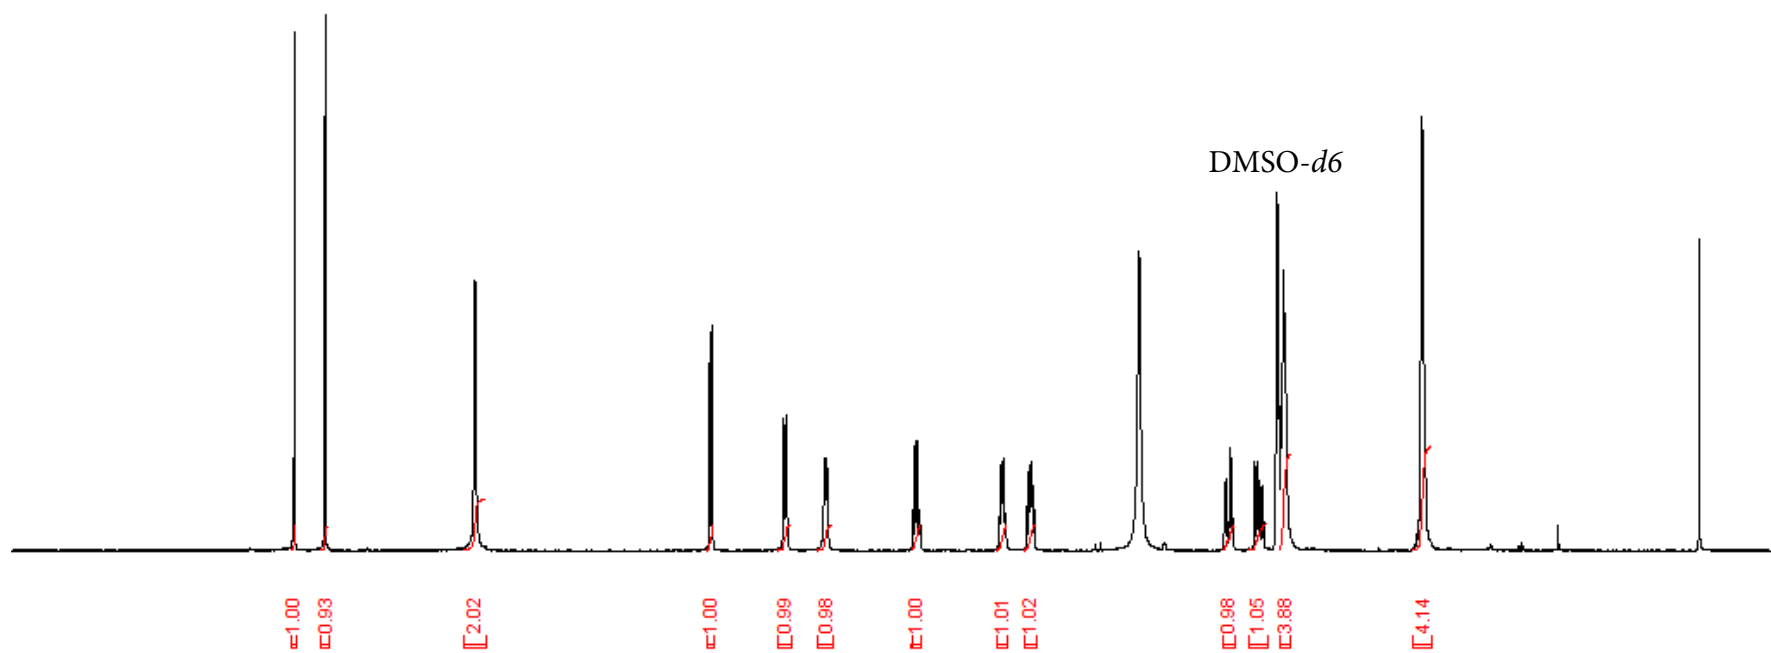

DMSO-*d*<sub>6</sub>

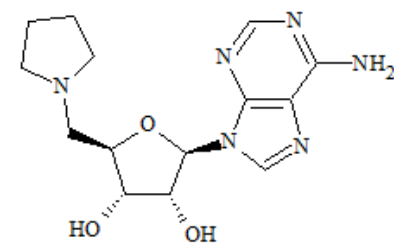

**11**

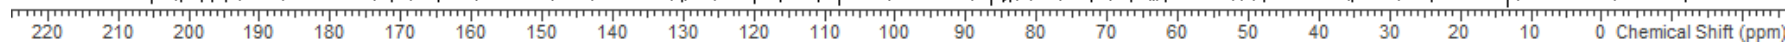



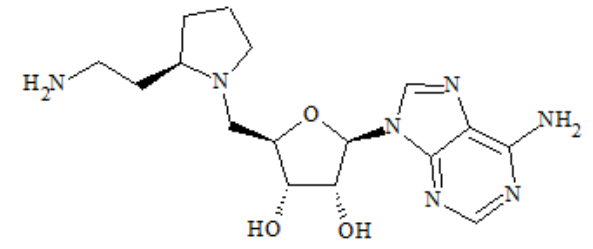

12

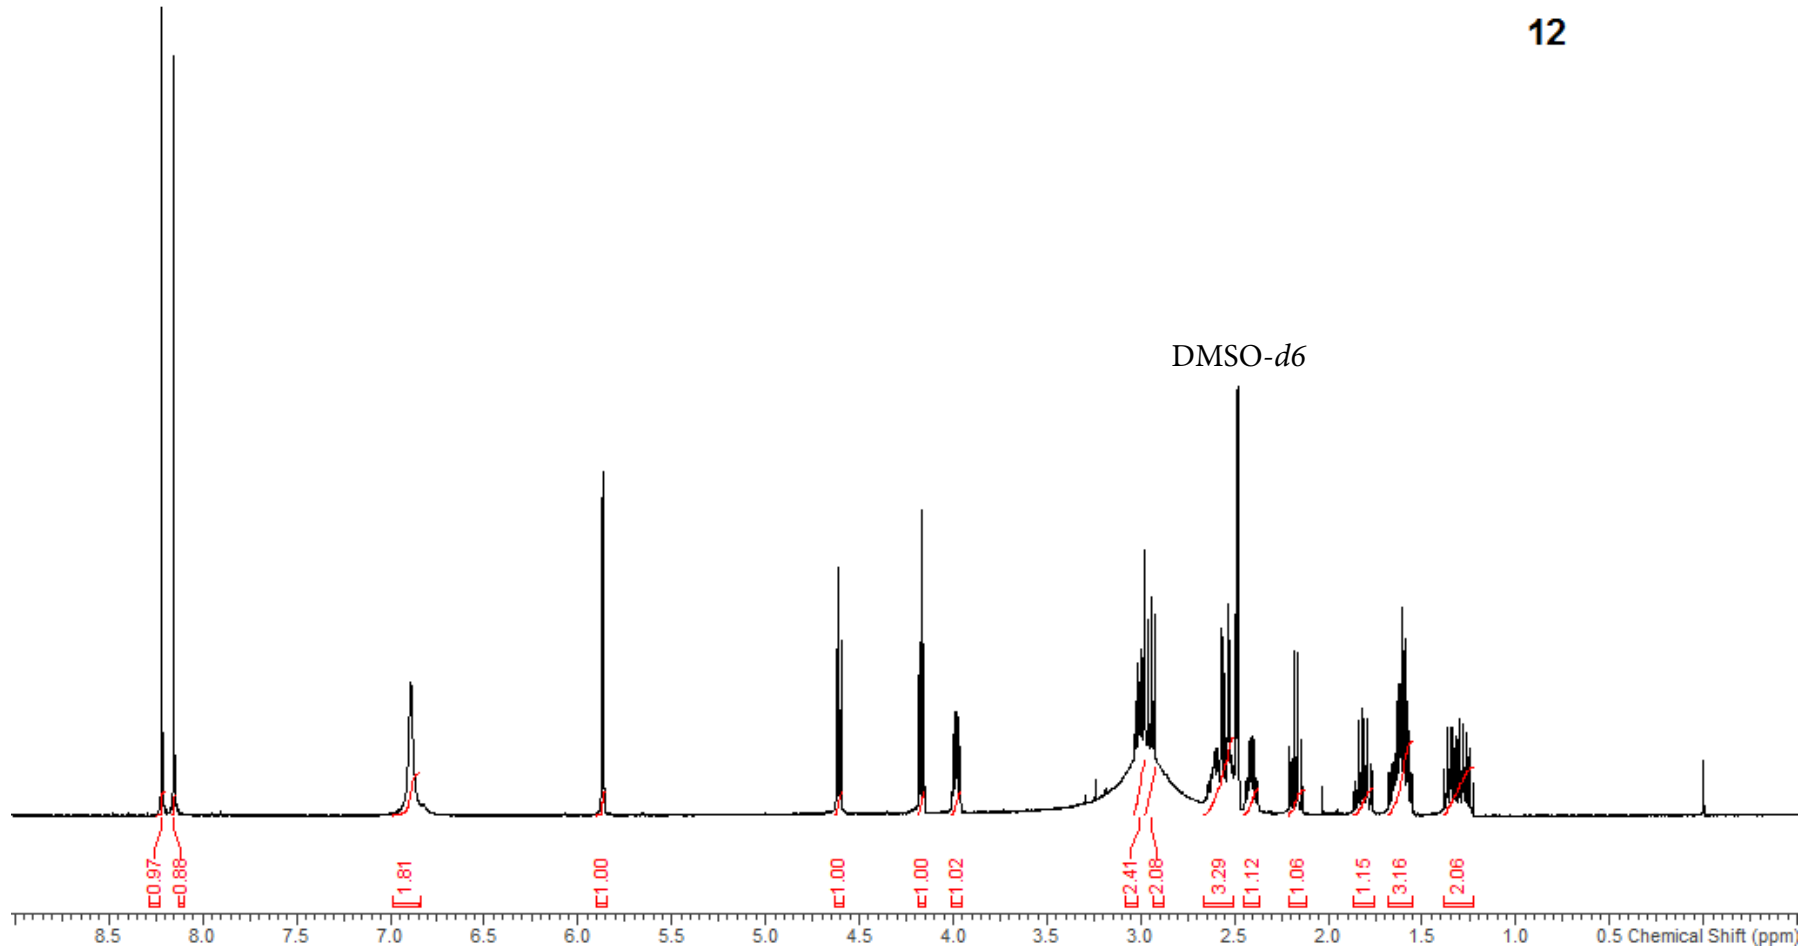

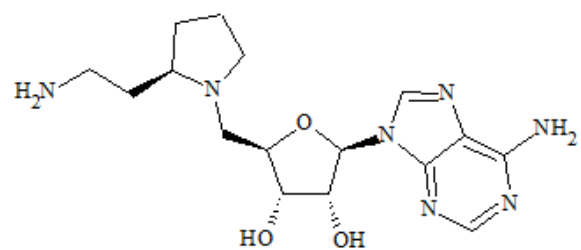

12

DMSO-*d*<sub>6</sub>

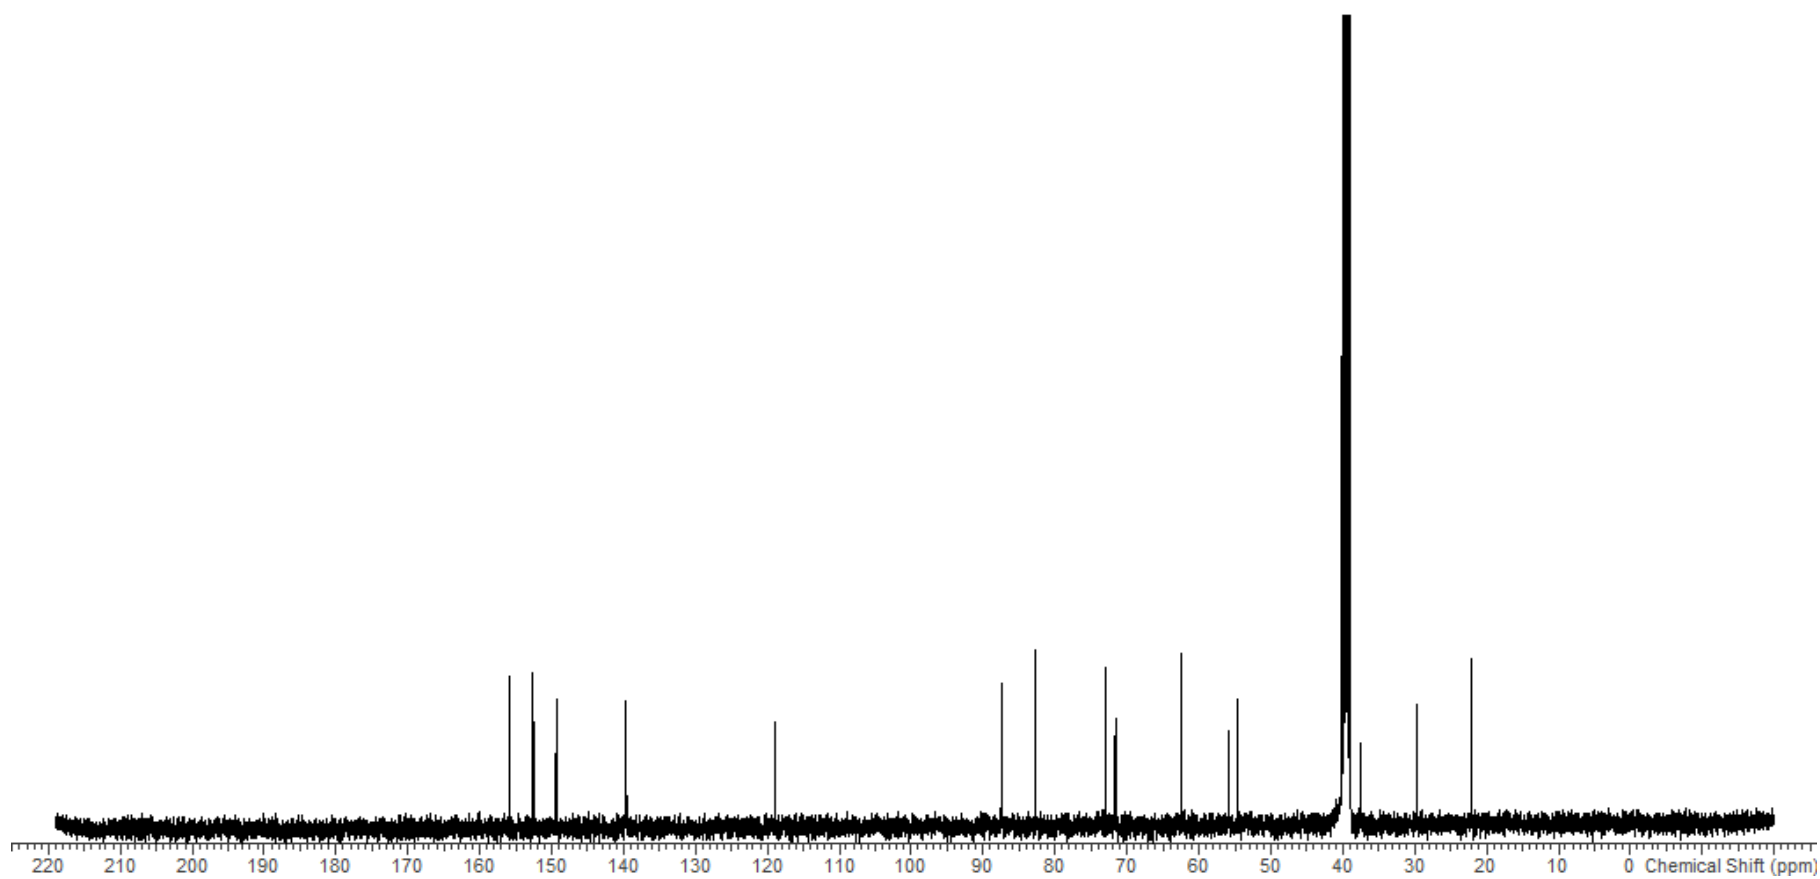

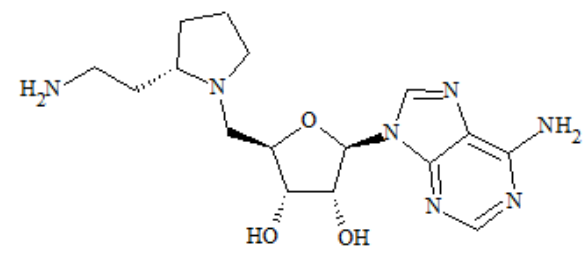

13

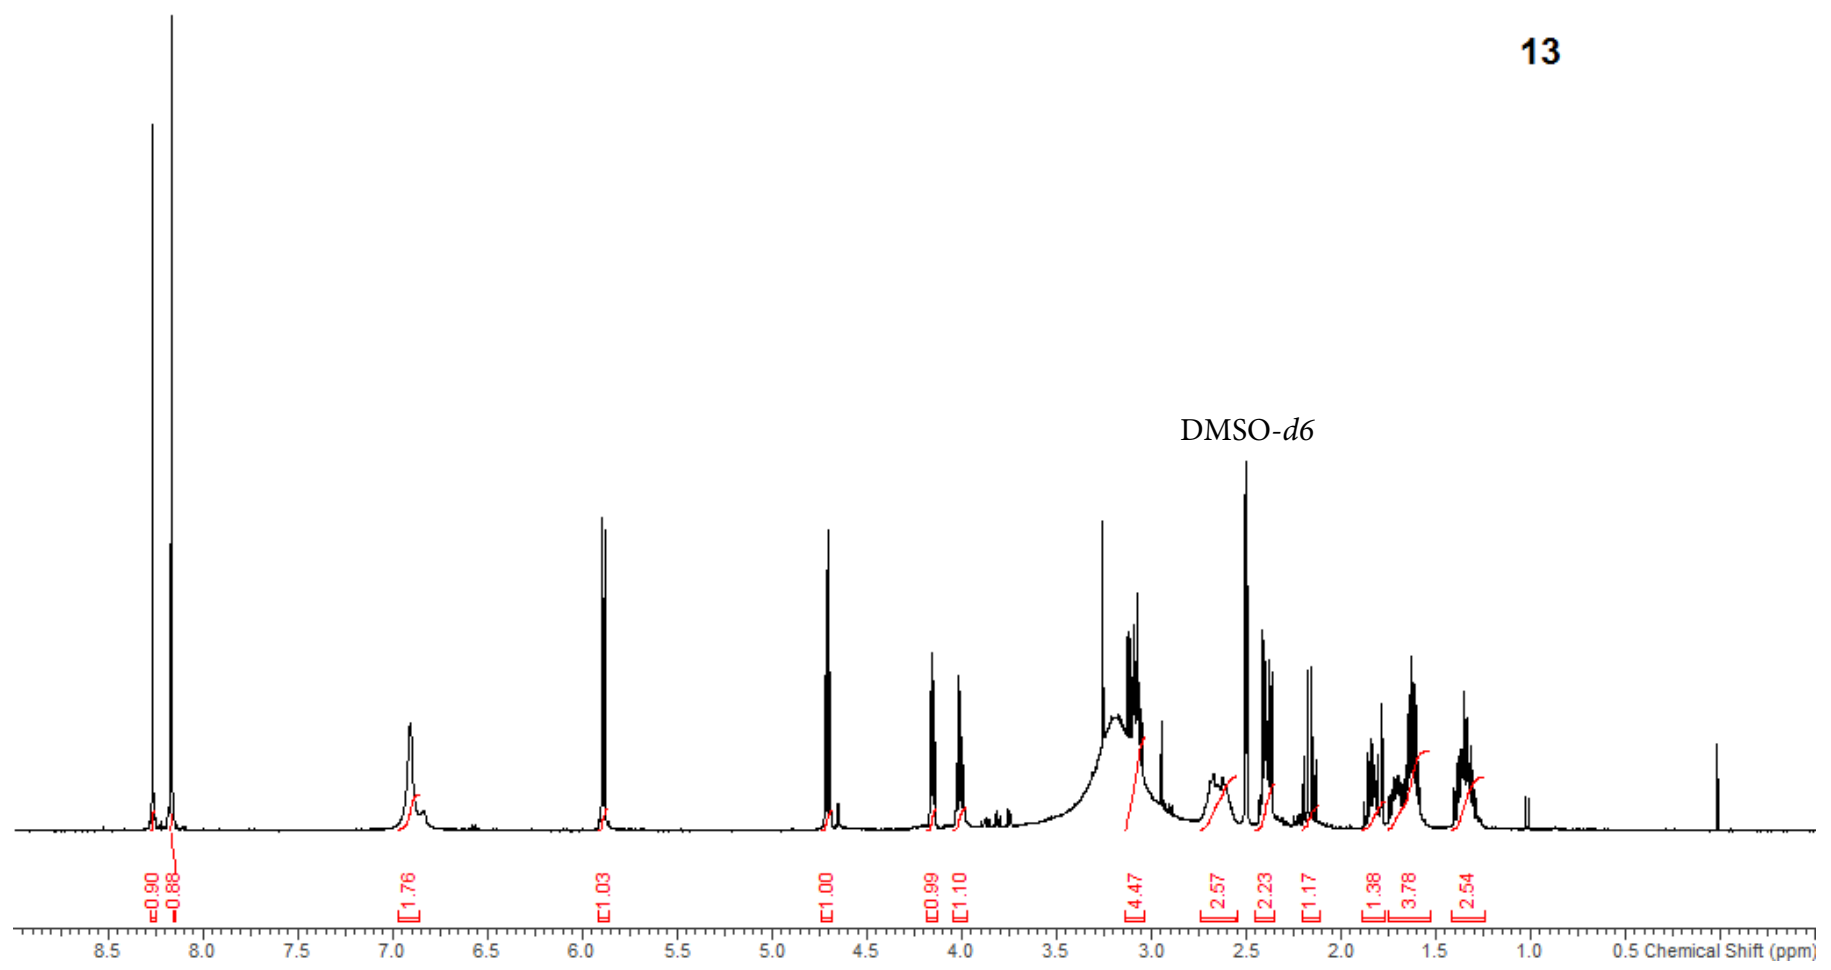

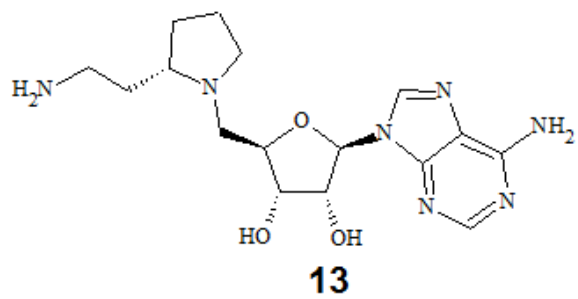

DMSO-*d*<sub>6</sub>

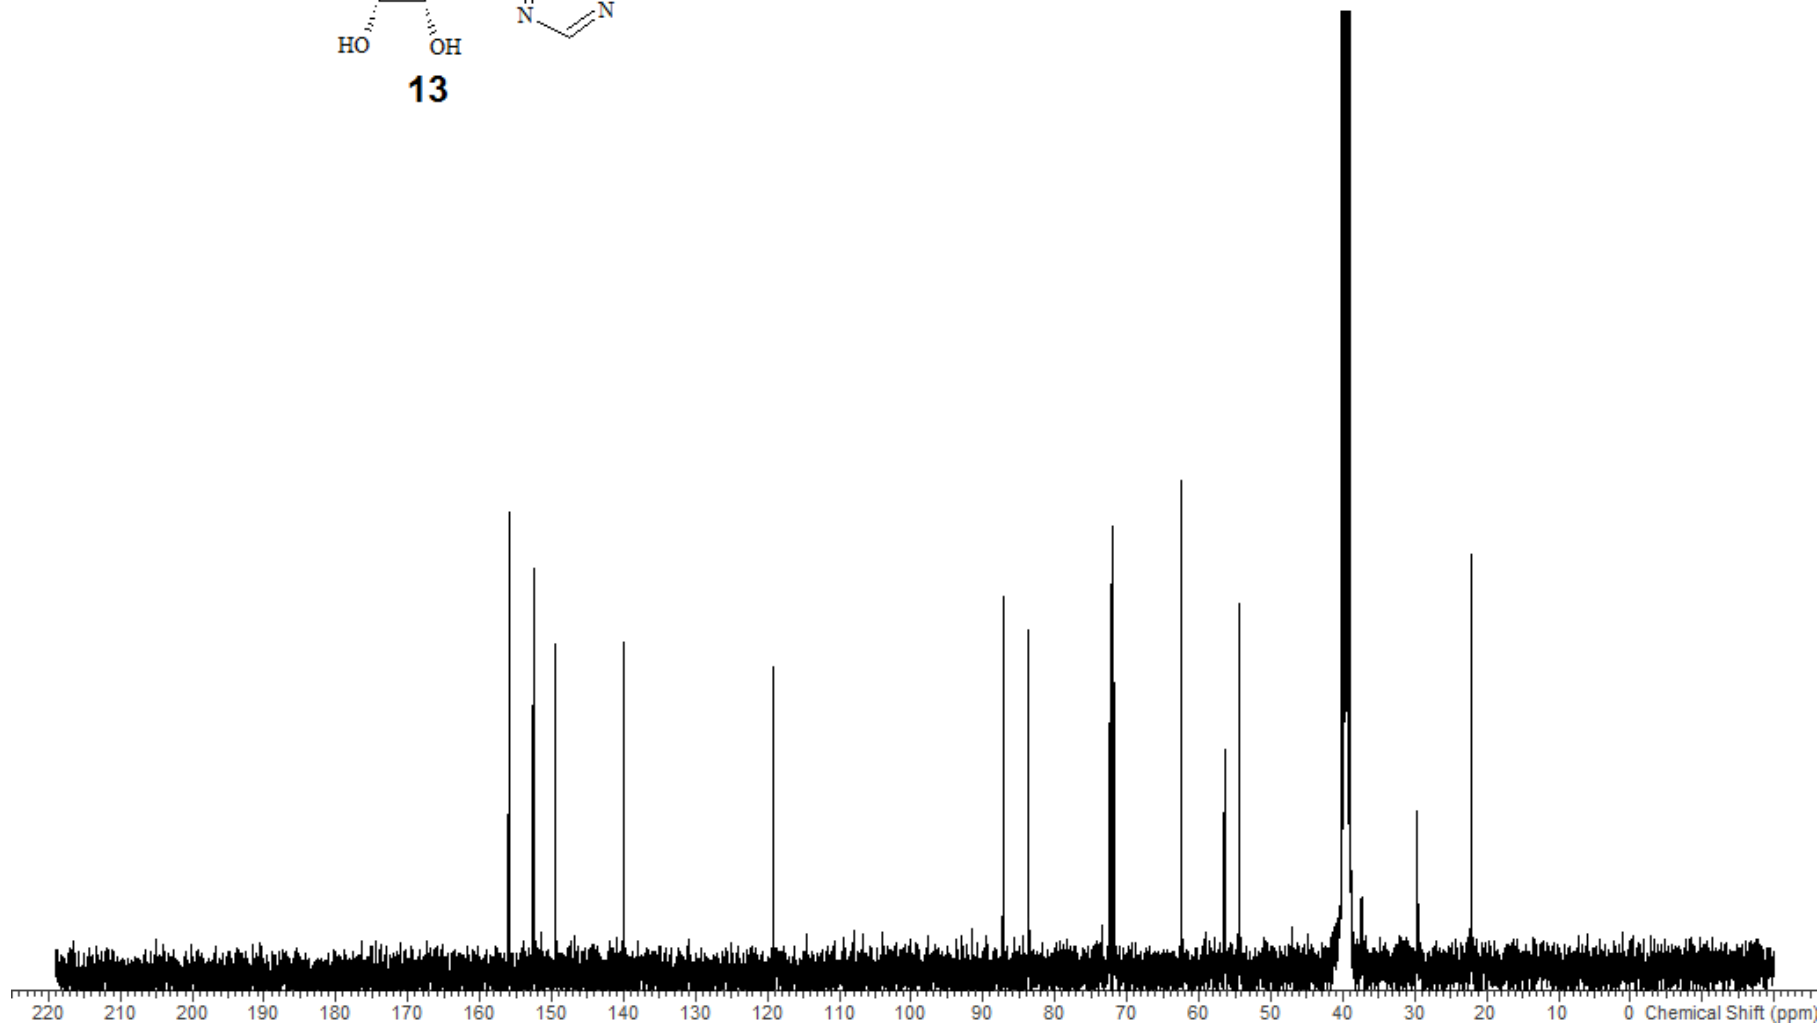

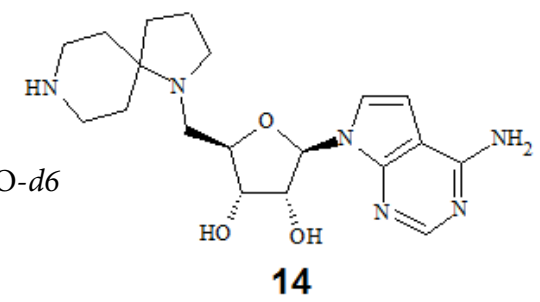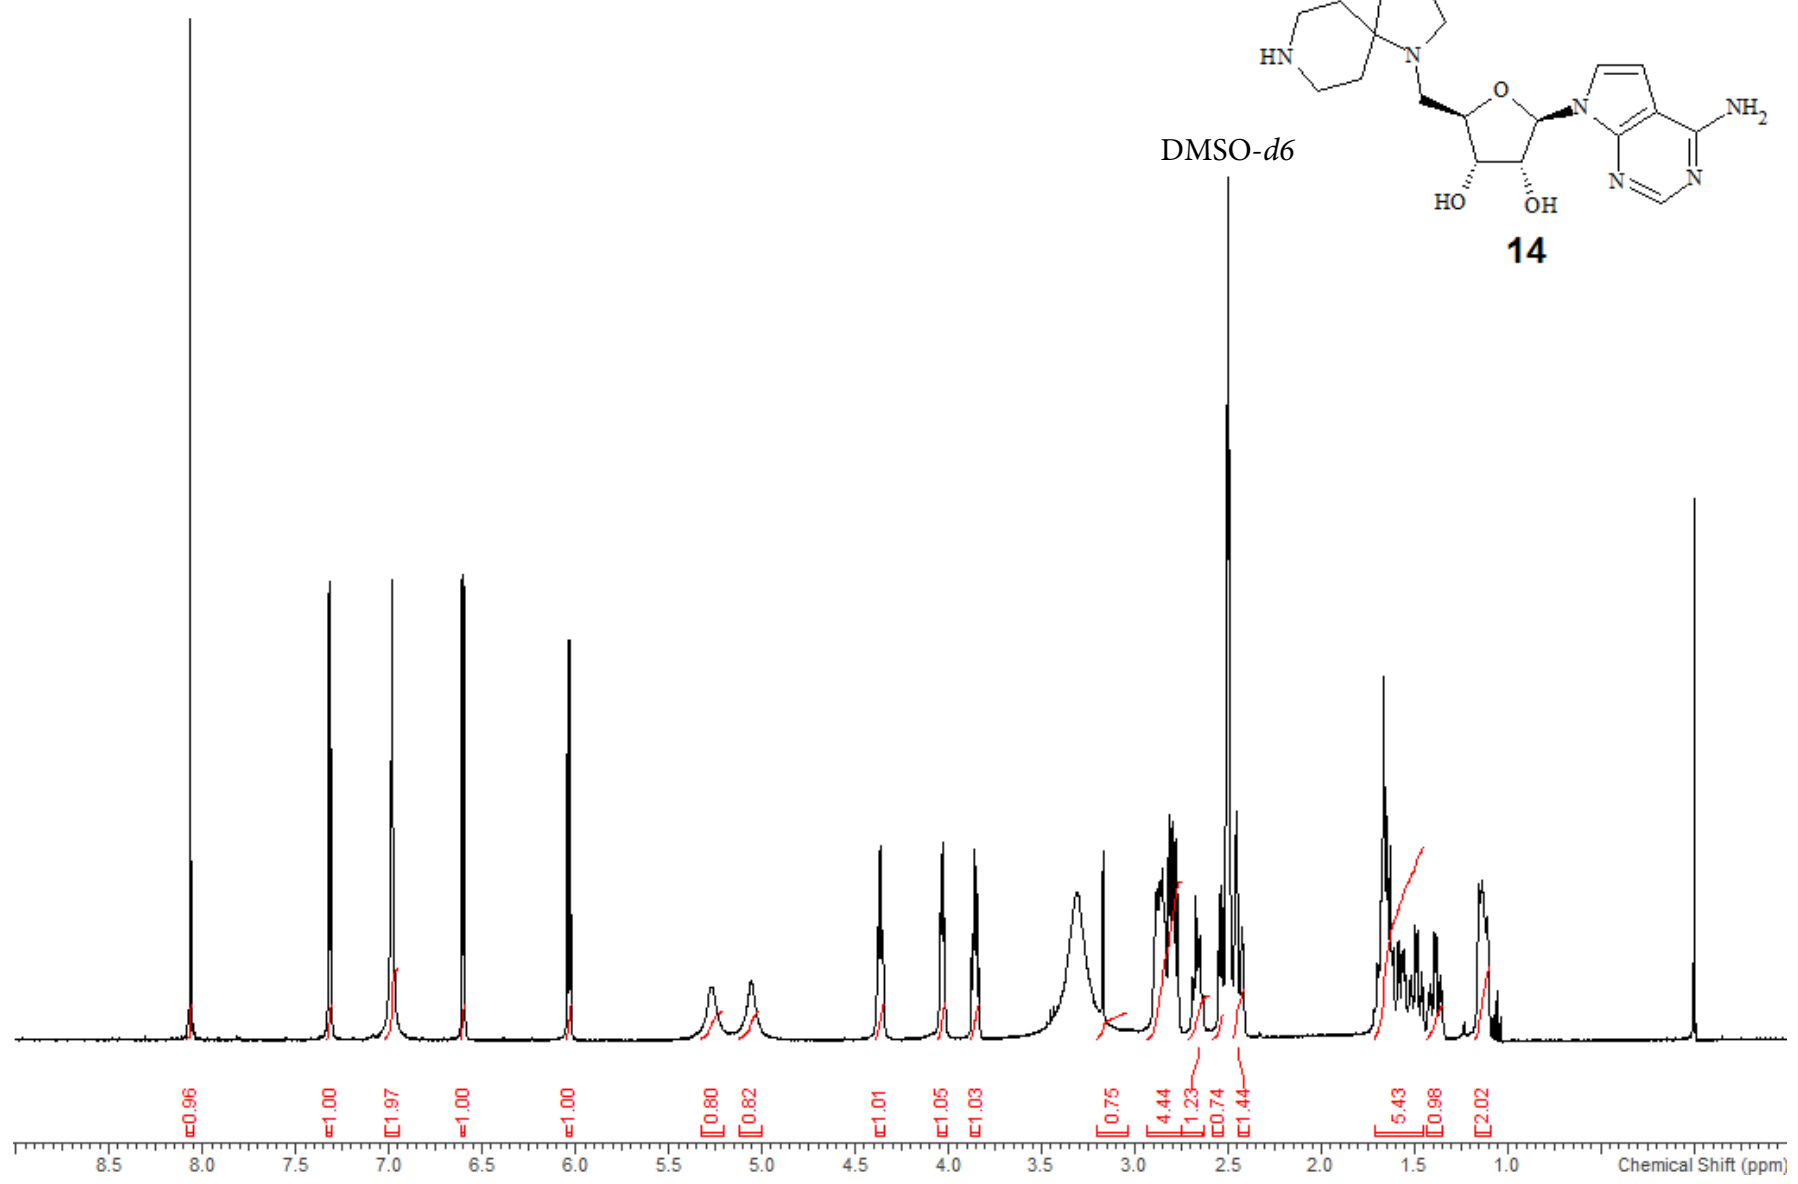

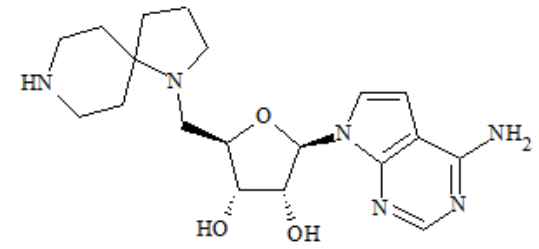

DMSO-*d*<sub>6</sub>

**14**

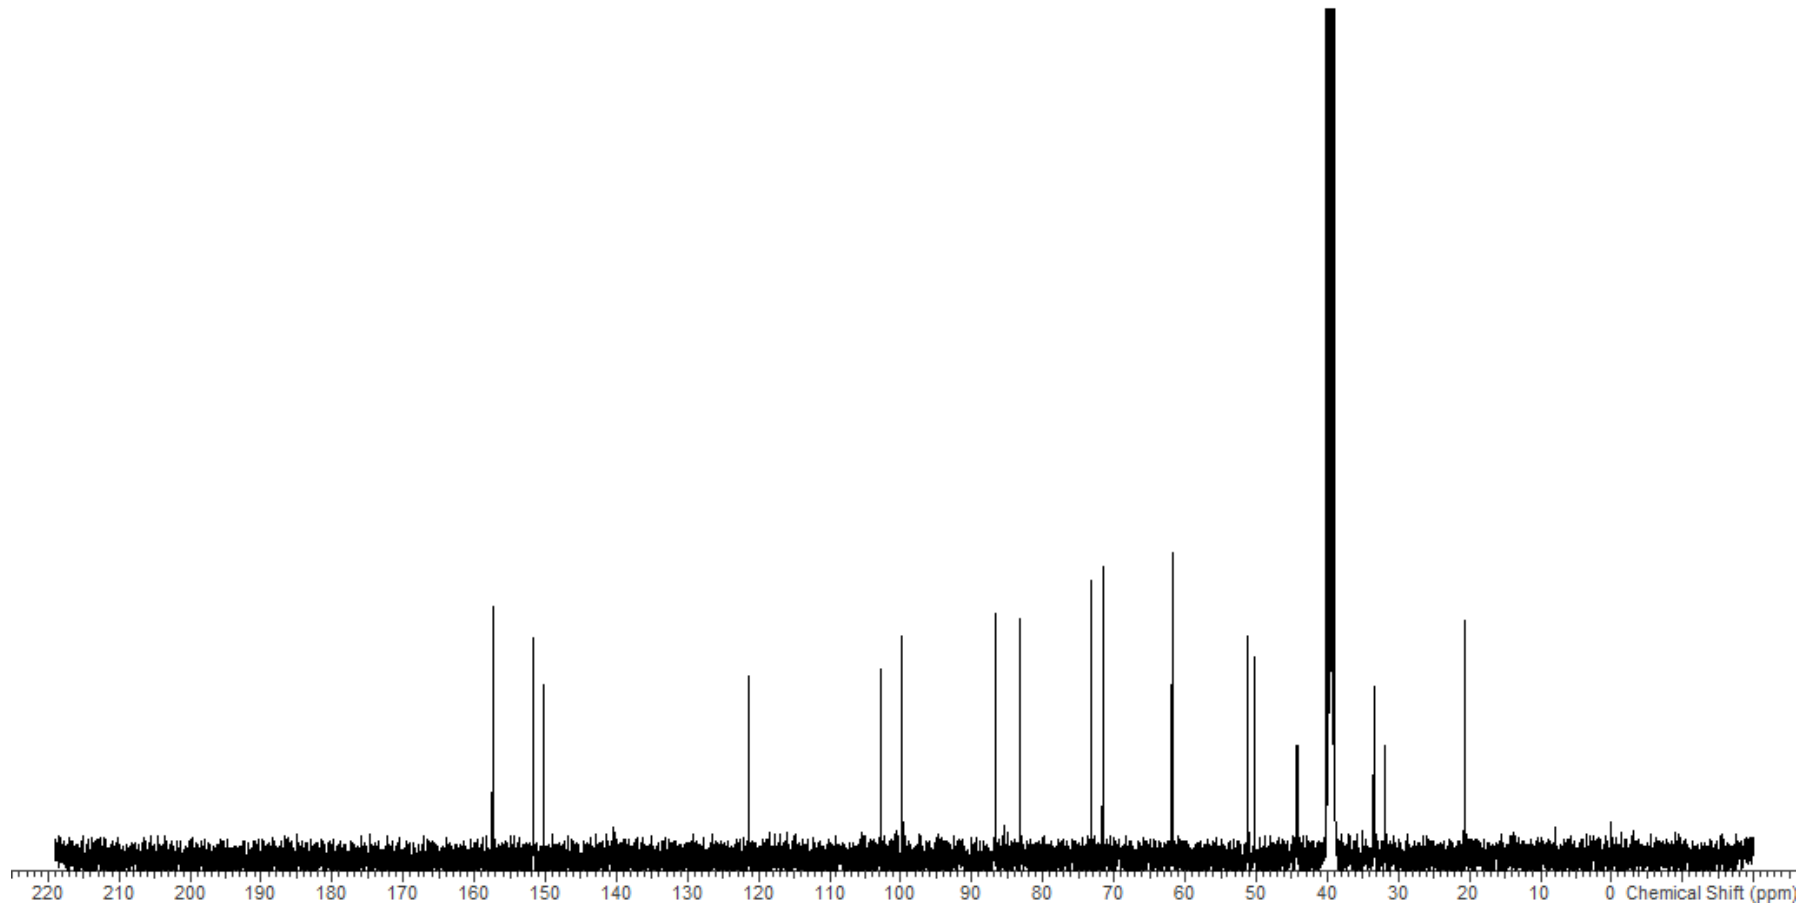

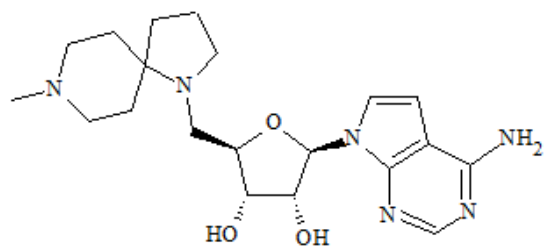

15

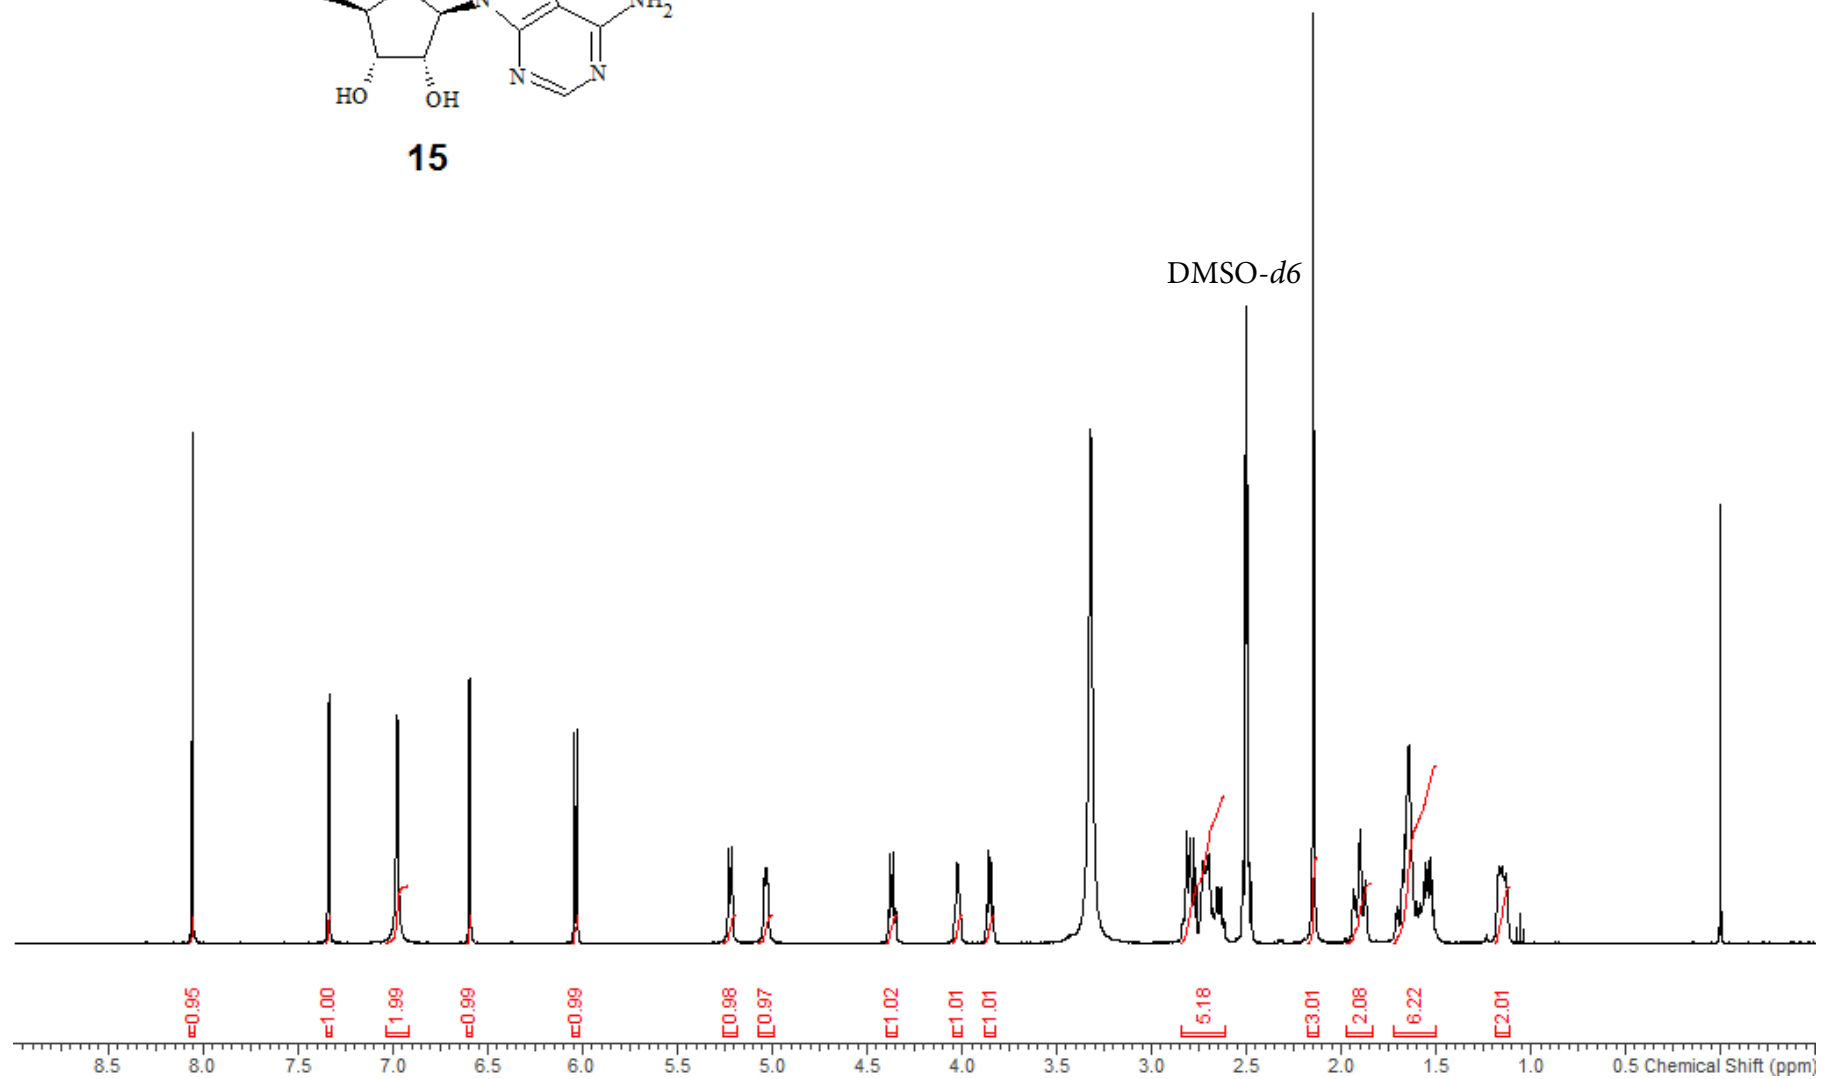

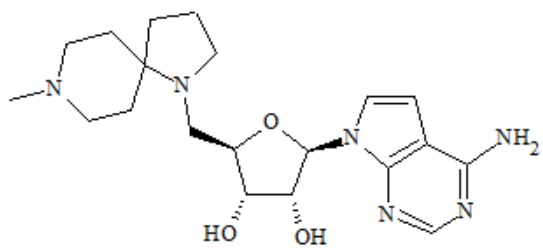

**15**

DMSO-*d*<sub>6</sub>

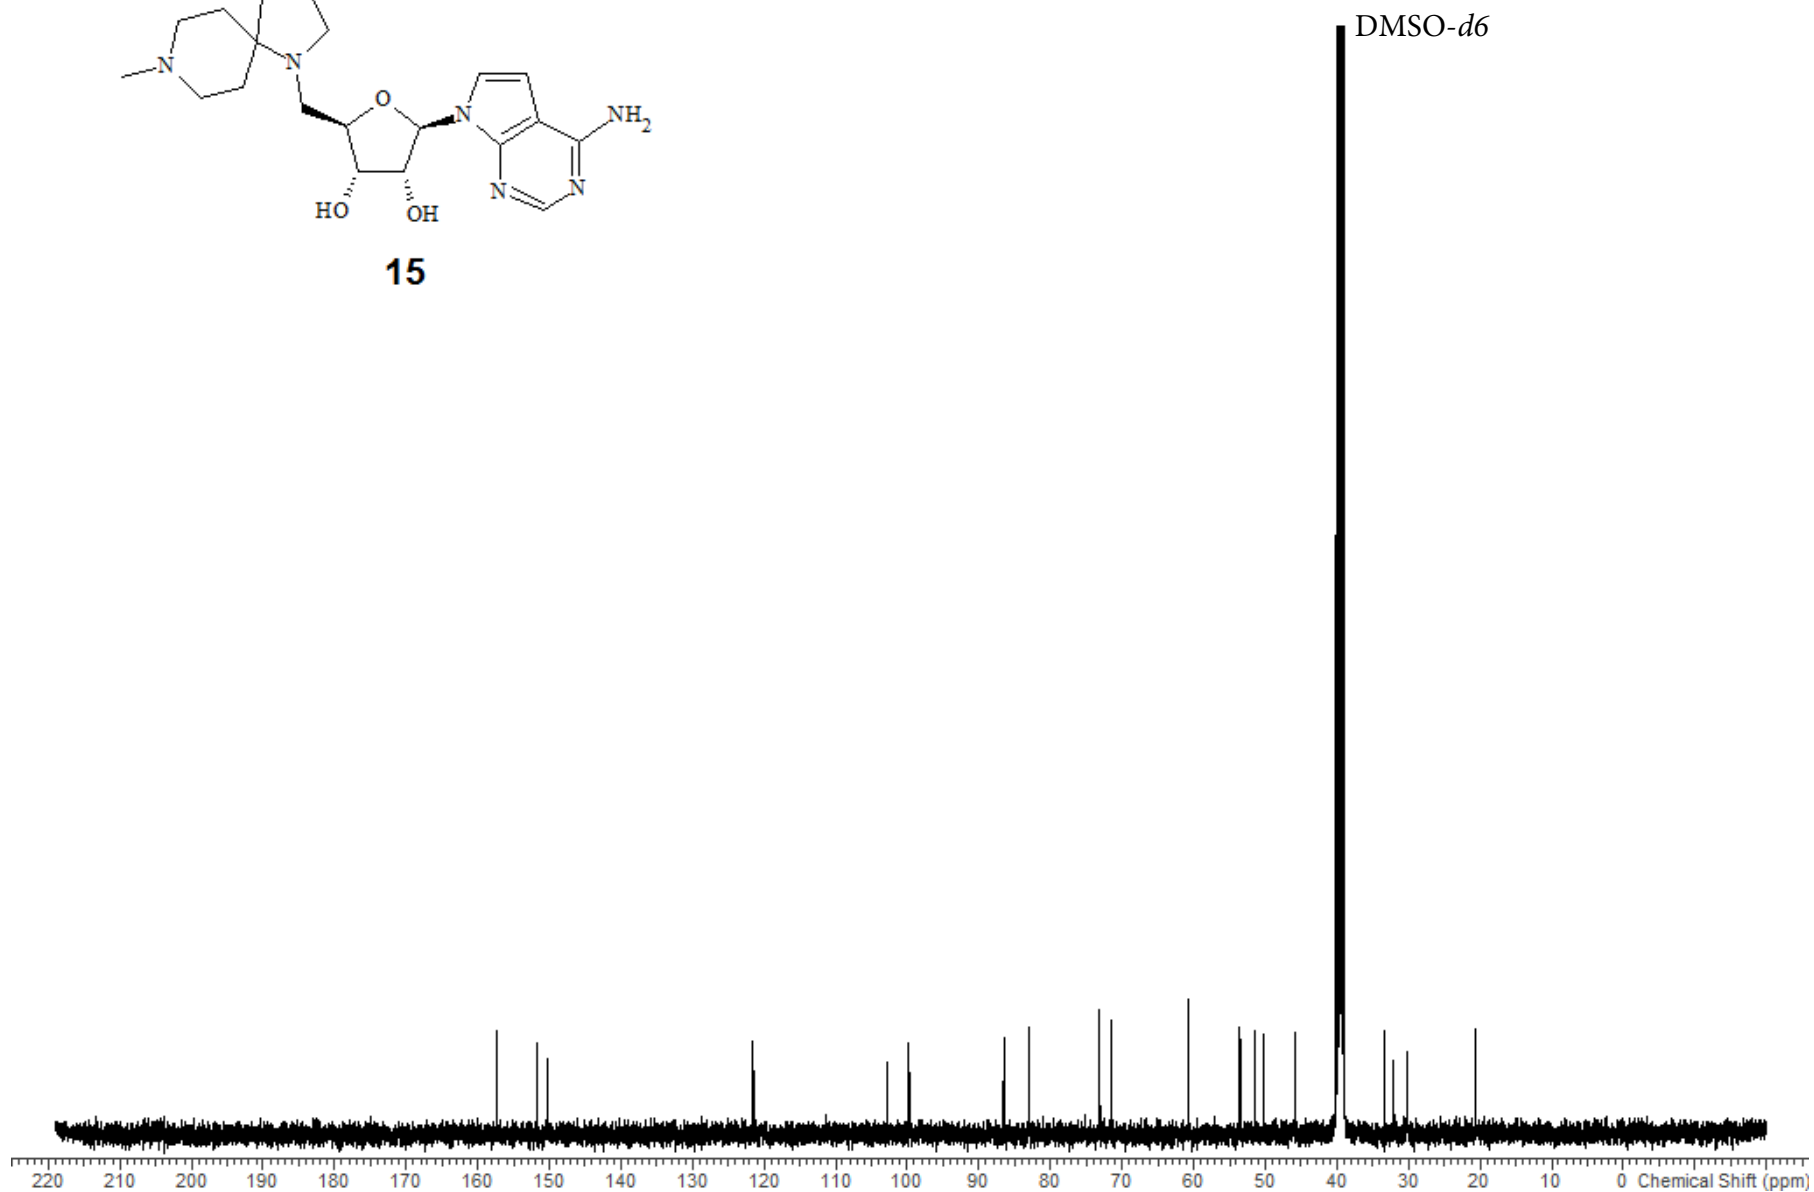



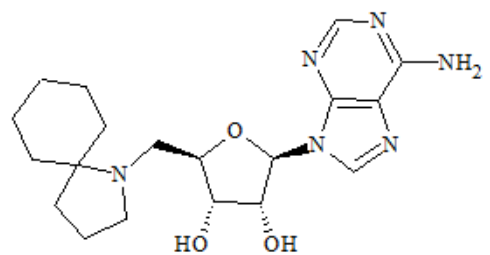

**16**

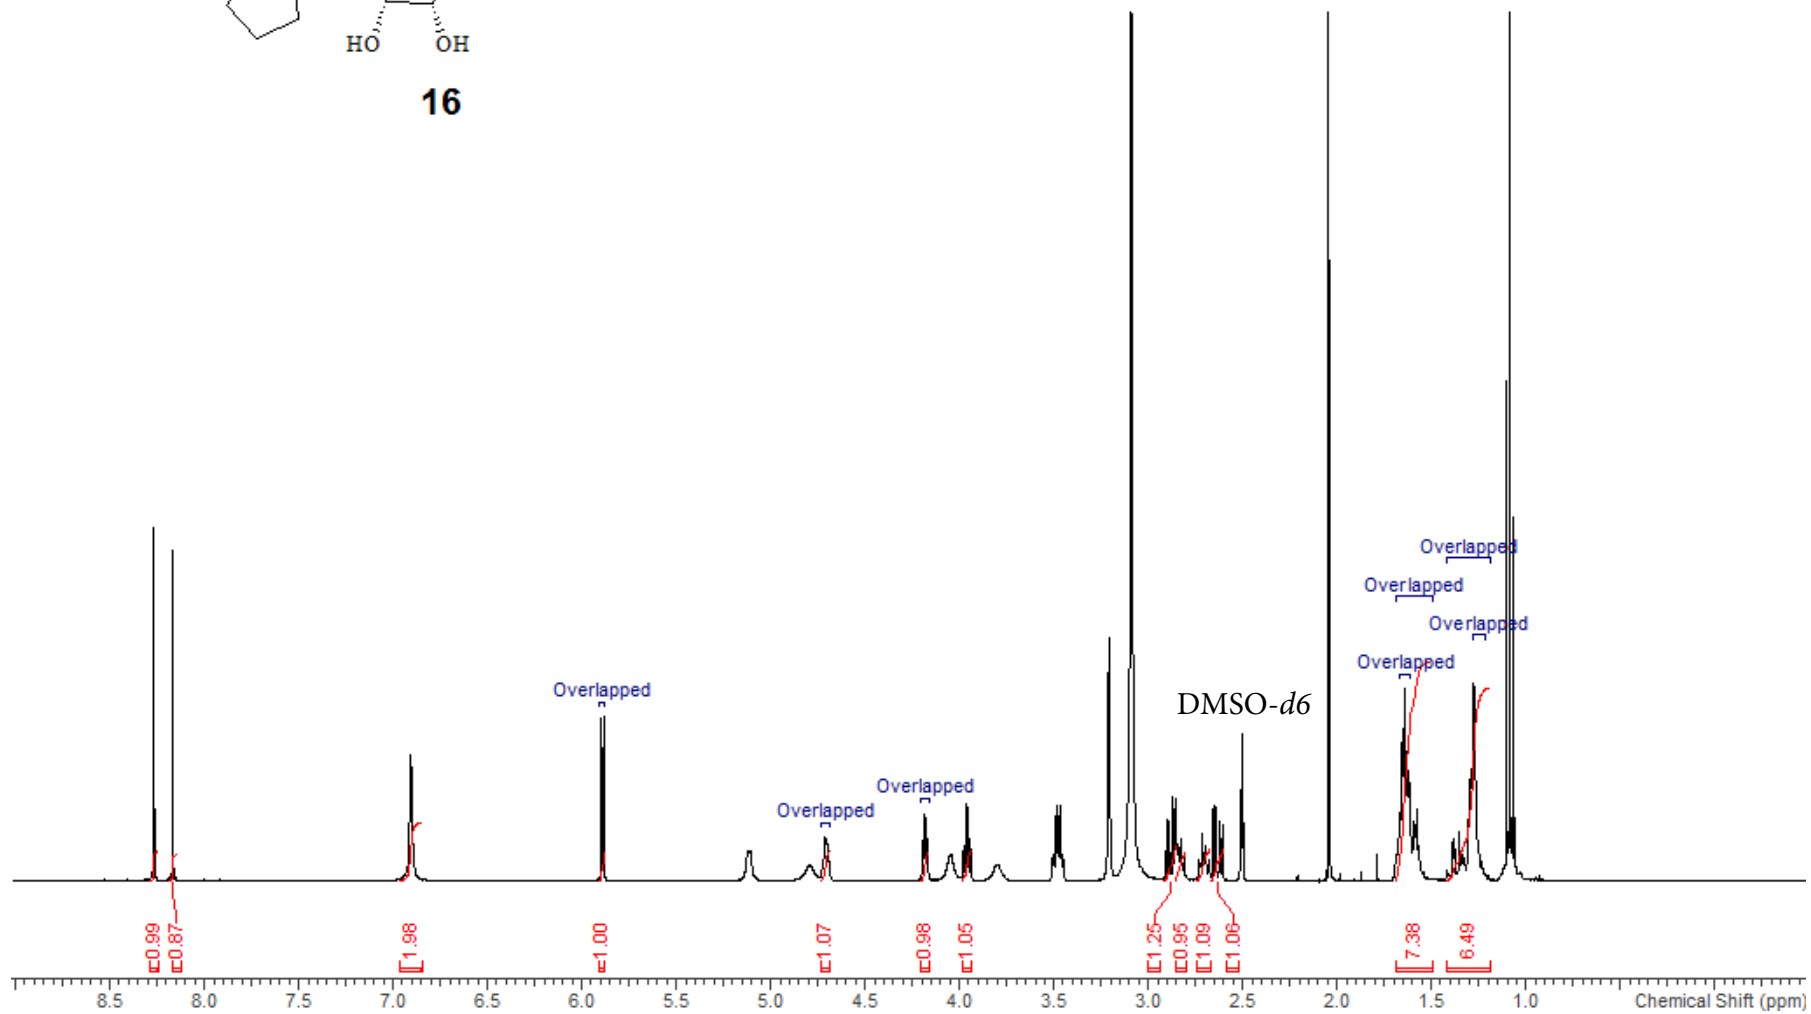

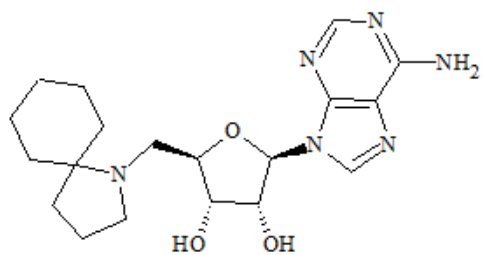

**16**

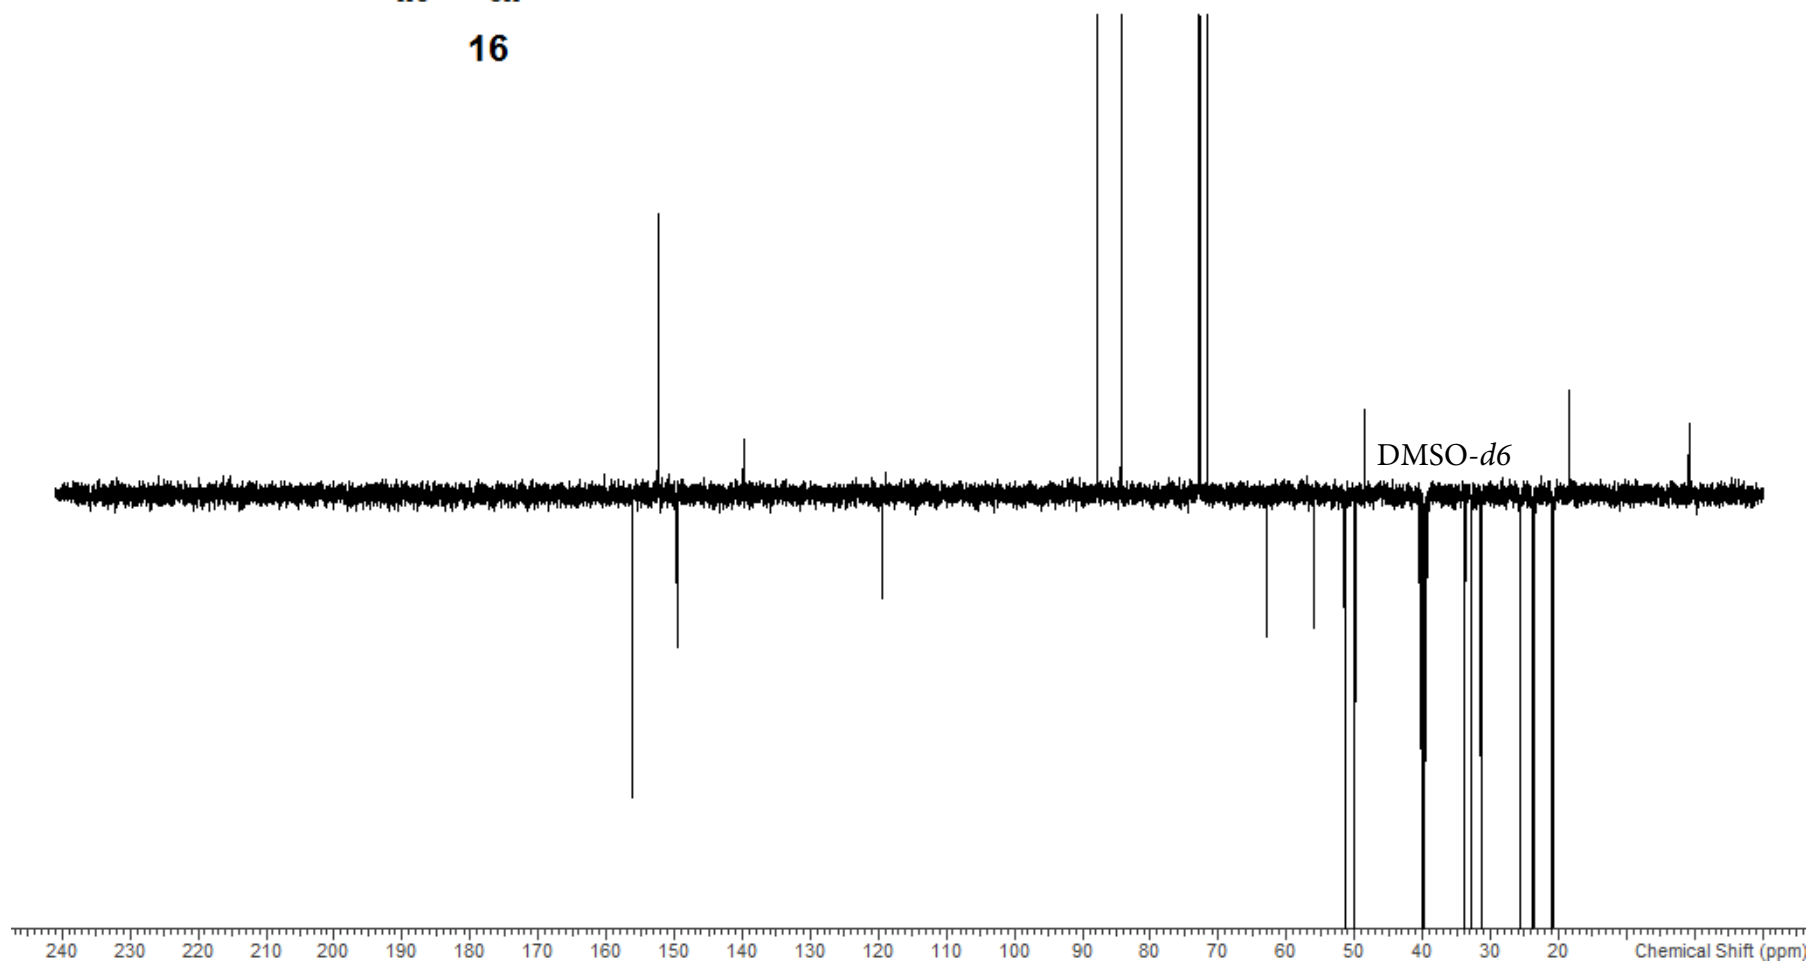

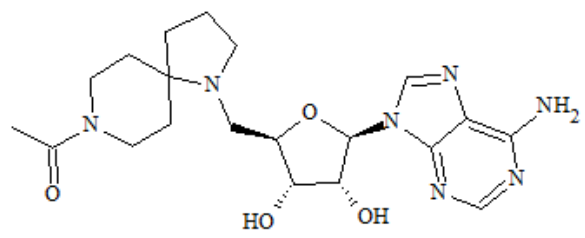

17

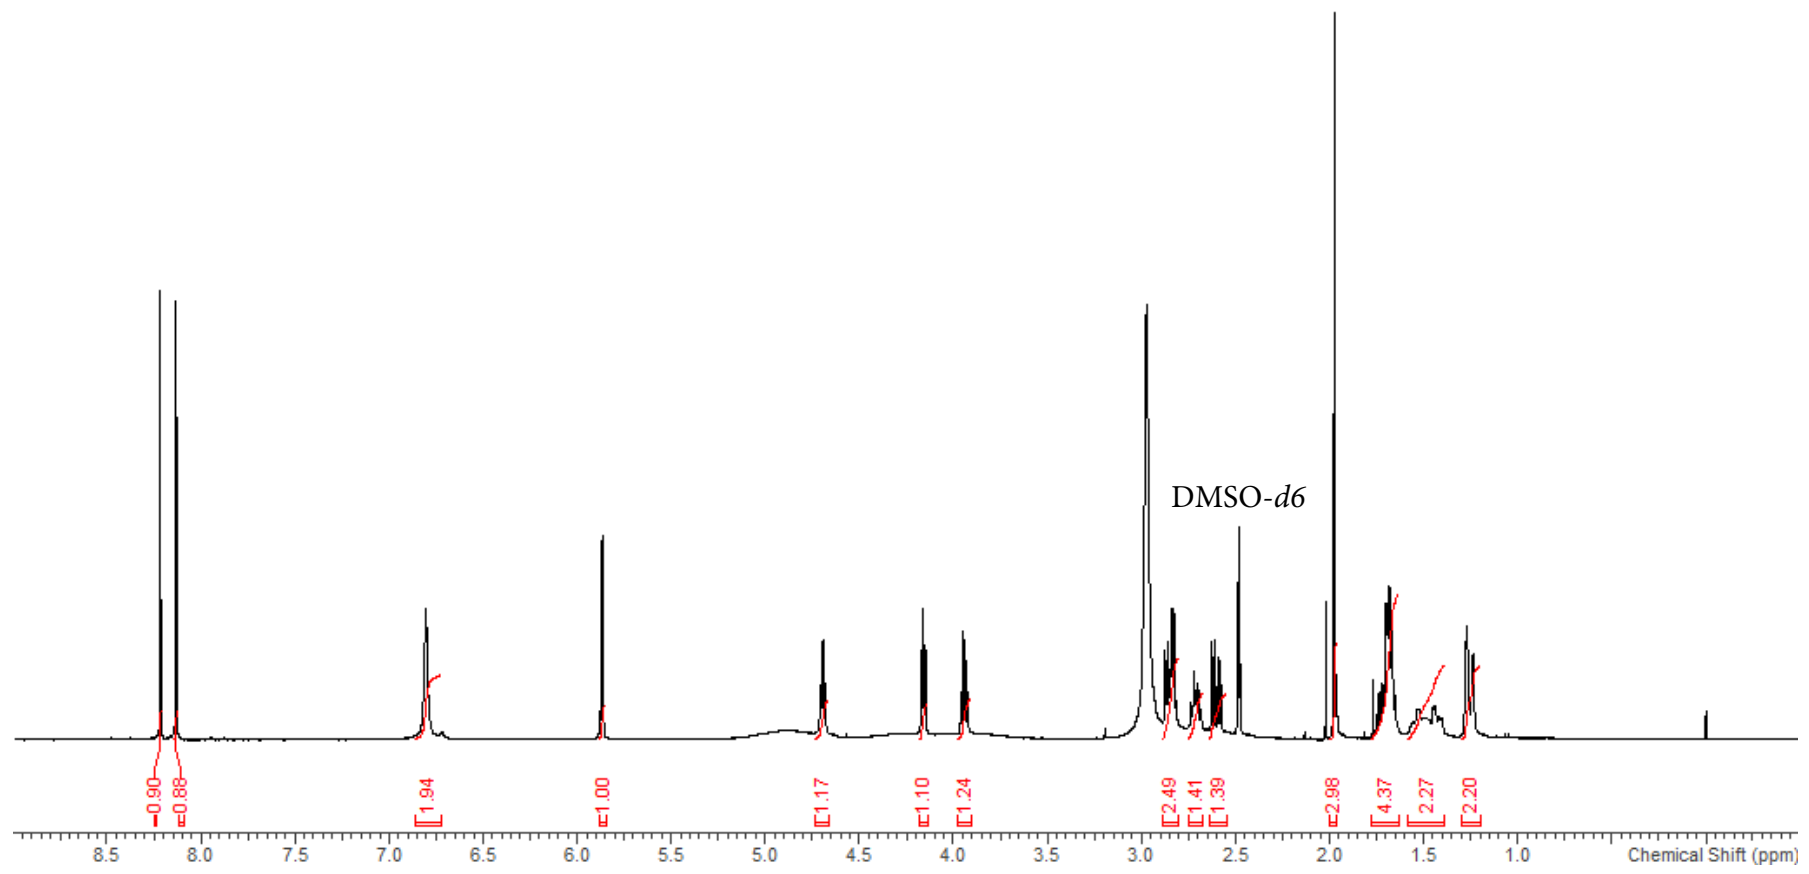

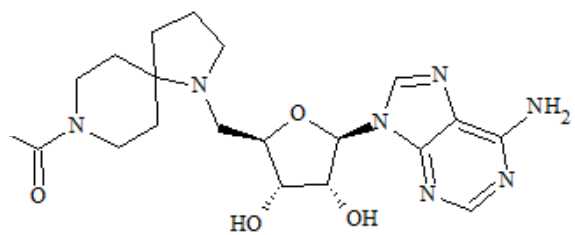

17

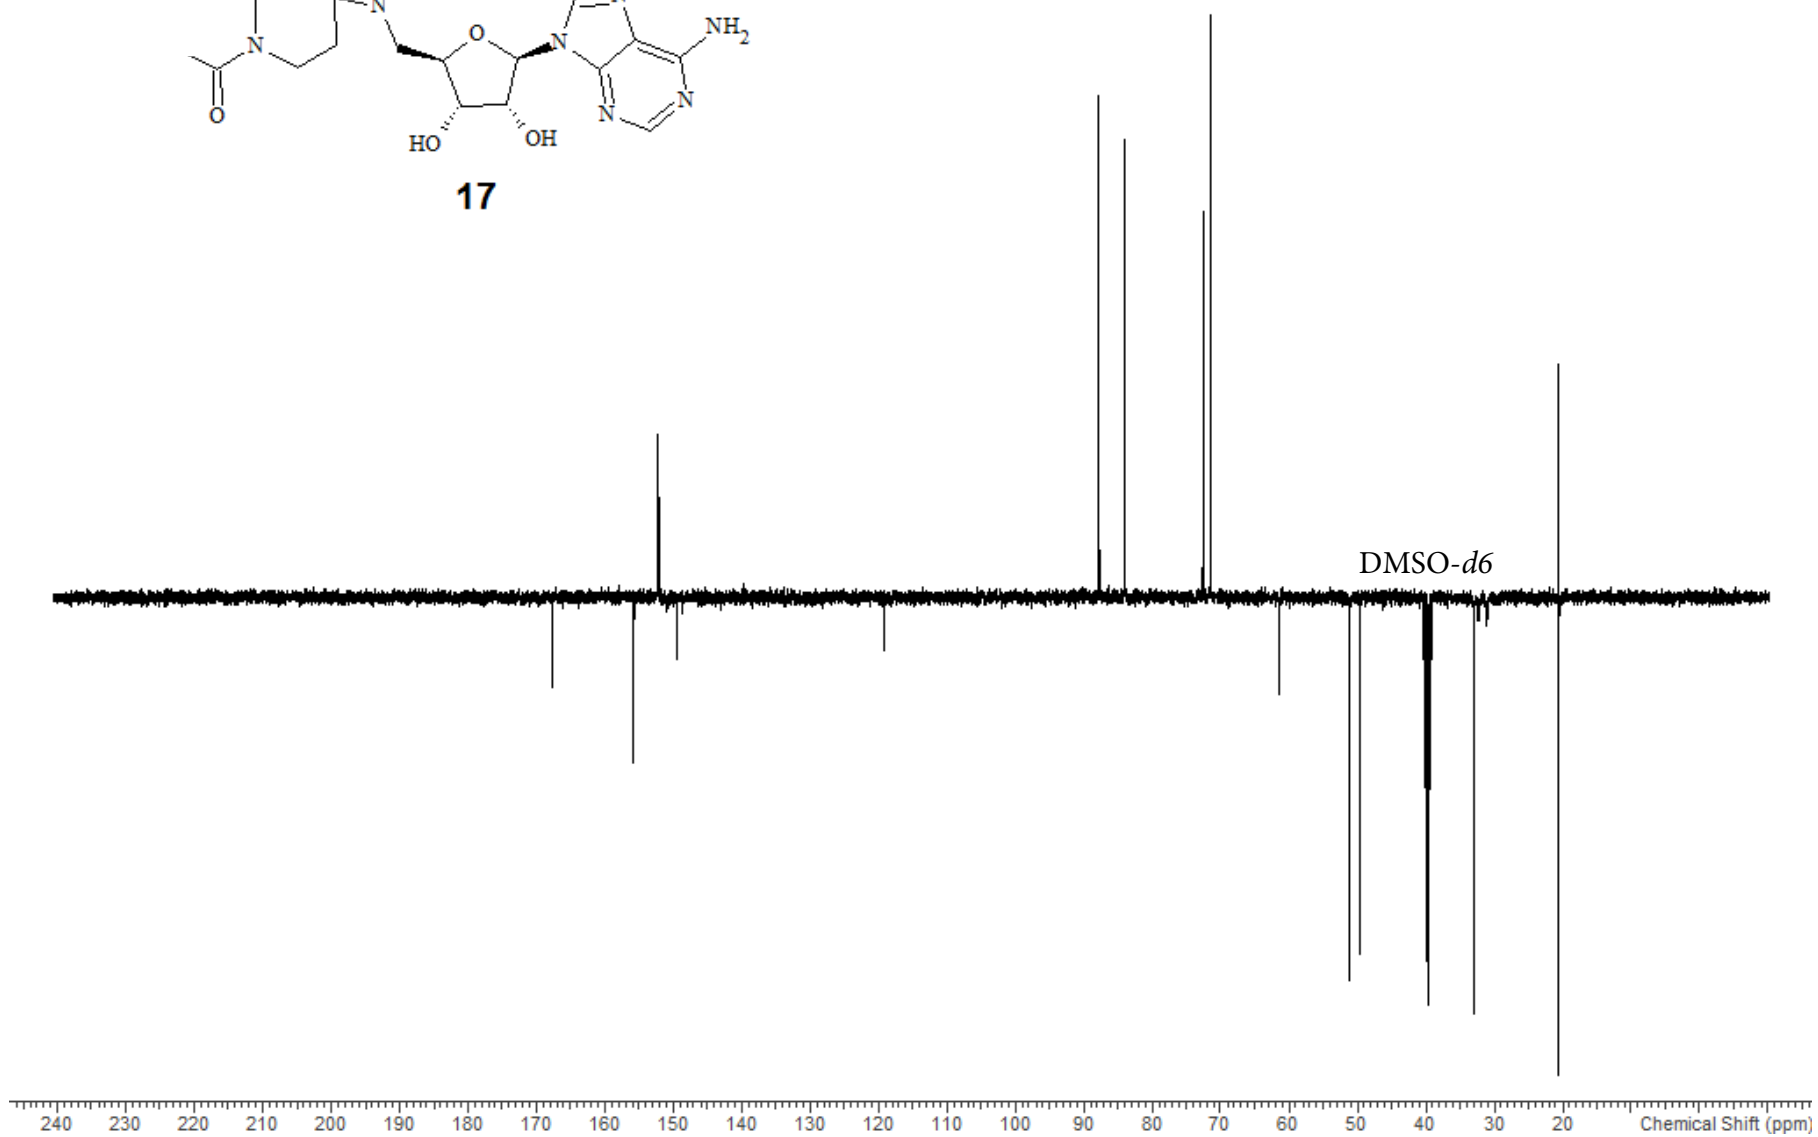

Supplement: ml0c00355_si_002.pdf [file ml0c00355_si_002.pdf]
